# Supplementary material for: LIBRA-WA: a web application for ligand binding site detection and protein function recognition
Source: PubMed Central journal article supplement (PMC6192203; doi:10.1093/bioinformatics/btx715), 2017-11-06
Supplement: btx715_toti_et_al_supplementary.pdf [file btx715_toti_et_al_supplementary.pdf]

# LIBRA-WA: a web application for ligand binding site detection and protein function recognition

Daniele Toti<sup>1</sup>, Le Viet Hung<sup>2</sup>, Valentina Tortosa<sup>1</sup>, Valentina Brandi<sup>1</sup> and Fabio Polticelli<sup>1,3\*</sup>

<sup>1</sup>Department of Sciences, University of Roma Tre, 00146 Rome, Italy

<sup>2</sup>Department of Science and Technology, Nguyen Tat Thanh University, Ho chi Minh City, Vietnam

<sup>3</sup>National Institute of Nuclear Physics, Roma Tre Section, 00146 Rome, Italy

Received on XXXXX; revised on XXXXX; accepted on XXXXX

## 1 SUPPLEMENTARY METHODOLOGY

### 1.1 Clusterization of ligands according to their mutual similarity

The ligands stored in LIBRA-WA's binding sites database have been clustered according to their mutual similarity, as computed by an automatic procedure that was meant to compare their SMILES representation. For this purpose, the SMILES information was retrieved from the Protein Data Bank in Europe<sup>0</sup> via a corresponding crawling mechanism, and a similarity threshold (set to 0.7 after a fine-tuning process) was placed for generating the clusters. The actual similarity score was computed by using a combination of Levenshtein and Jaccard distances applied to the SMILES strings. The clusters' semantics is as follows: each ligand has been placed into a cluster so that its similarity score with all of the other members of the cluster is above or equal the given threshold; the ligand with the highest average similarity score with the other members of the cluster has been dubbed the "core" ligand of such a cluster. Each ligand is thus present within one cluster at most. Clusters can be freely browsed by LIBRA-WA users via their corresponding web page, where the ligands making up each cluster are shown.

### 1.2 Extension and refinements of the alignment output and the scoring mechanism

Results produced by LIBRA-WA have been enriched with respect to LIBRA with additional information and a new scoring mechanism. Specifically, each binding site alignment record displayed within the results of an alignment process now features the information related to the cluster the corresponding ligand falls into (if any), including the core ligand of the cluster, its total size and the number of records within the result page whose ligand falls into that cluster. Alternatively, if the ligand from the record is not included in any cluster, the ligands from other records that are most similar to the considered ligand are shown. Along with the cluster information, a new, refined score mechanism has been implemented to rank more accurately the alignment records. This new score ( $S_{new}$ ) combines the contributions given by the aligned binding site's clique size ( $C$ , corresponding to the number of matching residues between the input protein and the target binding site), RMSD value ( $R$ ) and the relative size of the cluster containing the ligand ( $K$ ), each normalized according to the following formulas:

$$C_n = \frac{C - C_{min}}{C_{max} - C_{min}} \quad (1)$$

$$R_n = \frac{1 - (R - R_{min})}{R_{max} - R_{min}} \quad (2)$$

\*To whom correspondence should be addressed

<sup>0</sup> <http://www.ebi.ac.uk/pdbe-srv/pdbechem/>

$$K_n = \frac{K - K_{min}}{K_{max} - K_{min}} \quad (3)$$

where  $min$  and  $max$  indicate the minimum and maximum value of the respective parameter observed in the considered alignment records.

These normalized values are then weighted and linearly combined according to the following formula:

$$S_{new} = w_c * C_n + w_r * R_n + w_k * K_n \quad (4)$$

where  $w_c = 0.5$ ,  $w_r = 0.3$  and  $w_k = 0.2$ . According to its respective value for  $S_{new}$ , each alignment record shows a "Confidence" indicator for the quality of the alignment itself, ranging from "green" ( $S_{new} \geq 0.7$ ), to "yellow" ( $0.4 \leq S_{new} < 0.7$ ), up to "red" ( $S_{new} < 0.4$ ).

### 1.3 Identification of ligand binding sites across different protein subunits

As a result of the extensive experimentation carried out on LIBRA (Viet Hung *et al.*, 2015), a number of cases were detected where the program could not identify the correct ligand binding site for the input protein, due to the fact that such a site included residues belonging to different protein subunits or "chains". As a matter of fact, the original algorithm was able to identify only binding sites whose residues belonged to the same chain. In order to overcome this weakness of the application, a mechanism has been devised for identifying binding sites across different chains, by considering, for each residue of a given chain, its neighbours from different chains within a distance threshold. Since a naive iterative approach for performing this computation would obviously degrade the efficiency of the algorithm, residues have been thus indexed via a kind of  $n$ -dimensional indexes called KD-Trees, by using the three-dimensional coordinates of their geometric center as their index key. Then, the identification of their neighbours was only a matter of computing the respective Euclidean distances between residues belonging to different chains by applying an efficient nearest-neighbour algorithm, as implemented by (Levy *et al.*, 2015). This resulted in an extremely fast computation that leaves the original performance of LIBRA's algorithm virtually unaffected, while increasing its accuracy for such critical cases.

### 1.4 Additional features and improvements to user experience

Aside from the scientific advancements mentioned in the previous paragraphs, whose purpose was to improve the effectiveness of the alignment process, LIBRA-WA provides the users with an improved user experience and additional features as described below.

**1.4.1 User account and personal panel** As a web application (sharing the same architectural framework of (Atzeni *et al.*, 2011a,b; Toti *et al.*, 2012)), LIBRA-WA can be freely accessed and used by any web user without

## Bioinformatics's Recognition Panel

| Recognize the function of a given protein |           |                       | Display ligand clusters | Delete selected results |                        |                                                              |                |                |
|-------------------------------------------|-----------|-----------------------|-------------------------|-------------------------|------------------------|--------------------------------------------------------------|----------------|----------------|
| <input type="checkbox"/>                  | <b>Id</b> | <b>Creation date</b>  | <b>Status</b>           | <b>Completion level</b> | <b>Completion date</b> | <b>Results</b>                                               | <b>Export?</b> | <b>Delete?</b> |
| <input type="checkbox"/>                  | 144       | 2016-05-30 16:23:22.0 | Completed               | 100%                    | 2016-06-01 07:42:41.0  | Show                                                         | Export         | Delete         |
| <input type="checkbox"/>                  | 143       | 2016-05-30 16:23:17.0 | Completed               | 100%                    | 2016-06-01 02:31:35.0  | Show                                                         | Export         | Delete         |
| <input type="checkbox"/>                  | 142       | 2016-05-30 16:23:15.0 | Completed               | 100%                    | 2016-06-01 02:23:14.0  | Show                                                         | Export         | Delete         |
| <input type="checkbox"/>                  | 141       | 2016-05-30 16:23:13.0 | Completed               | 100%                    | 2016-06-01             | Input parameters                                             | Export         | Delete         |
| <input type="checkbox"/>                  | 140       | 2016-05-30 16:23:10.0 | Completed               | 100%                    | 2016-06-01             | Input protein: <b>4ake.pdb</b>                               | Export         | Delete         |
| <input type="checkbox"/>                  | 139       | 2016-05-30 16:23:08.0 | Completed               | 100%                    | 2016-06-01             | Input database: <b>Ligand binding sites</b>                  | Export         | Delete         |
| <input type="checkbox"/>                  | 138       | 2016-05-30 16:23:06.0 | Completed               | 100%                    | 2016-05-31             | Minimum percentage of similar residues: <b>70</b>            | Export         | Delete         |
| <input type="checkbox"/>                  | 137       | 2016-05-30 16:23:03.0 | Completed               | 100%                    | 2016-05-31             | Minimum motif size: <b>5</b>                                 | Export         | Delete         |
| <input type="checkbox"/>                  | 136       | 2016-05-30 16:22:50.0 | Completed               | 100%                    | 2016-05-31             | Maximum alignment RMSD (Å): <b>2.5</b>                       | Export         | Delete         |
| <input type="checkbox"/>                  | 135       | 2016-05-30 16:22:45.0 | Completed               | 100%                    | 2016-05-31             | Inter-residues distance similarity threshold (Å): <b>1.5</b> | Export         | Delete         |
| <input type="checkbox"/>                  | 134       | 2016-05-30 16:22:44.0 | Completed               | 100%                    | 2016-05-31 07:25:08.0  | Check steric clashes: <b>No</b>                              | Export         | Delete         |
| <input type="checkbox"/>                  | 133       | 2016-05-30 16:22:38.0 | Completed               | 100%                    | 2016-05-31 05:40:34.0  | Chain check: <b>Yes</b>                                      | Export         | Delete         |
| <input type="checkbox"/>                  | 132       | 2016-05-30 16:22:35.0 | Completed               | 100%                    | 2016-05-31 05:05:59.0  | Maximum distance for chain check (Å): <b>20</b>              | Export         | Delete         |
| <input type="checkbox"/>                  | 131       | 2016-05-30 16:22:33.0 | Completed               | 100%                    | 2016-05-31 04:44:29.0  | Structure level: <b>Backbone and side chain</b>              | Export         | Delete         |
| <input type="checkbox"/>                  | 130       | 2016-05-30 16:22:31.0 | Completed               | 100%                    | 2016-05-31 04:04:23.0  | Conservation measure: <b>Residue identity</b>                | Export         | Delete         |
| <input type="checkbox"/>                  | 129       | 2016-05-30 16:22:28.0 | Completed               | 100%                    | 2016-05-31 03:32:27.0  | Show                                                         | Export         | Delete         |
| <input type="checkbox"/>                  | 128       | 2016-05-30 16:22:27.0 | Completed               | 100%                    | 2016-05-31 03:03:57.0  | Show                                                         | Export         | Delete         |
| <input type="checkbox"/>                  | 127       | 2016-05-30 16:22:21.0 | Completed               | 100%                    | 2016-05-31 01:39:35.0  | Show                                                         | Export         | Delete         |
| <input type="checkbox"/>                  | 126       | 2016-05-30 16:22:16.0 | Completed               | 100%                    | 2016-05-30 21:41:04.0  | Show                                                         | Export         | Delete         |
| <input type="checkbox"/>                  | 125       | 2016-05-30 16:22:02.0 | Completed               | 100%                    | 2016-05-30 16:28:39.0  | Show                                                         | Export         | Delete         |

First | 1 2 3 4 5 6 7 | Last

| Recognize the function of a given protein |  |  | Display ligand clusters | Delete selected results |  |  |  |
|-------------------------------------------|--|--|-------------------------|-------------------------|--|--|--|
|-------------------------------------------|--|--|-------------------------|-------------------------|--|--|--|

**Fig. 1.** Screenshot of a user's personal panel in LIBRA-WA, where recognition jobs scheduled, running or completed are shown. For the user's convenience, hovering the mouse over a recognition job displays a summary of the input parameters used when launching it, as shown in the case of the third result from the top. Once available, each result can be browsed in greater detail ("Show"), exported in the LIBRA/LIBRA+ .alg desktop file format ("Export") or deleted altogether ("Delete"). From this panel, a user can access the page where recognitions can be launched ("Recognize the function of a given protein"), as well as browse the ligand clusters generated from the currently available database ("Display ligand clusters").

the need for setting up a personal account; users can start and schedule multiple recognition jobs as they see fit. Optionally, LIBRA-WA allows users to also create a personal workspace on the server by providing a valid e-mail address and selecting a personal password. Once their registration is confirmed via the e-mail sent by the system, they can access their personal panel (as shown in Figure 1). Recognition jobs started by users are automatically placed by the system into its centralized queue and executed in a First-In-First-Out (FIFO) fashion. At the present time, each user can execute only one job at a time while having an unlimited number of scheduled jobs in the queue. Recognition jobs can be launched against a number of pre-compiled databases, including: a manually curated ligand binding sites database, dating back to 2015, with more than 173,000 entries; an unsupervised ligand binding site database, last updated in Q4 2017, including more than 200,000 entries; and a database of active sites derived from the Catalytic Site Atlas (Furnham, 2014) (~1000 entries) that can be used for the prediction of the catalytic activity of an input protein. Registered users can also edit their personal information and log-in credentials via the corresponding page. Each result can be individually analyzed via a corresponding

panel showing the alignments produced by the recognition job, as displayed in Figure 2. This panel provides the user with the functionalities to sort the results as needed (by score, clique size, RMSD, protein, ligand, etc.) and filter them by protein, ligand and "core ligand" of a cluster. Besides, the user can display three-dimensional representations of the aligned proteins, check referenced literature for the proteins featured in the database, as well as export the results as described below.

**1.4.2 Backward compatibility with LIBRA desktop application and introduction of LIBRA+** The results produced by LIBRA-WA can be easily exported as LIBRA recognition files (.alg) for offline viewing via the desktop application. Additionally, a new version of the desktop application, called LIBRA+, has been released in order to include and display the clusters information and the new scoring mechanism for each of the recognition files: such information is also retroactively available for results produced with the previous version of the desktop application when opened with LIBRA+.

**Recognition result for 1ESC (id: 260)** (1)

[Export .alg file](#)

[--Back to Recognition Panel](#)

**Filters**

Known protein:

Ligand:

Ligand in cluster:

(3)

(2) Input database: **Ligand binding sites**

Minimum percentage of similar residues: **70**

Minimum motif size: **5**

Maximum alignment RMSD (Å): **2.5**

Inter-residues distance similarity threshold (Å): **1.5**

Check steric clashes: **No**

Chain check: **Yes**

Structure level: **Backbone and side chain**

Conservation measure: **Residue identity**

| Known protein                    | Ligand | Input residues                                                                                                                                                                                       | Known residues                                                                                                                                                                                       | Binding site                                               | Site size | Conservation | Clique size | RMSD  | Cluster                                | Combined Score | Superimpose | Active site context | Info | Confic |
|----------------------------------|--------|------------------------------------------------------------------------------------------------------------------------------------------------------------------------------------------------------|------------------------------------------------------------------------------------------------------------------------------------------------------------------------------------------------------|------------------------------------------------------------|-----------|--------------|-------------|-------|----------------------------------------|----------------|-------------|---------------------|------|--------|
| ESTERASE                         | DEP    | ASP 13 A<br>TYR 186 A<br>PRO 128 A<br>LEU 127 A<br>LEU 126 A<br>PHE 110 A<br>ALA 67 A<br>GLY 65 A<br>CYS 64 A<br>PHE 19 A<br>TYR 15 A<br>HIS 283 A<br>ASN 106 A<br>GLY 105 A<br>GLY 66 A<br>SER 14 A | ASP 13 A<br>TYR 186 A<br>PRO 128 A<br>LEU 127 A<br>LEU 126 A<br>PHE 110 A<br>ALA 67 A<br>GLY 65 A<br>CYS 64 A<br>PHE 19 A<br>TYR 15 A<br>HIS 283 A<br>ASN 106 A<br>GLY 105 A<br>GLY 66 A<br>SER 14 A | ASP 13 A<br>SER 14 A<br>GLY 66 A<br>GLY 105 A<br>HIS 283 A | 6         | 1.0          | 16          | 0.467 | Cluster C11<br>Size: 2<br>Matches: 3   | 0.8            | Open Jmol   | Open Jmol           | Info |        |
| ESTERASE<br>ESTA                 | C8E    | SER 14 A<br>ILE 291 A                                                                                                                                                                                | SER 14 X<br>LEU 297 X                                                                                                                                                                                | SER 14 X<br>ASN 147                                        | 5         | 0.46         | 11          | 1.251 | Cluster 12P<br>Size: 60<br>Matches: 17 | 0.62           | Open Jmol   | Open Jmol           | Info |        |
| ESTERASE                         |        |                                                                                                                                                                                                      |                                                                                                                                                                                                      |                                                            | 9         |              |             | 0.254 | Cluster VXA<br>Size: 3<br>Matches: 1   | 0.45           | Open Jmol   | Open Jmol           | Info |        |
| ACETYL<br>YLAN E<br>ERASE<br>T2A |        |                                                                                                                                                                                                      |                                                                                                                                                                                                      |                                                            | 6         |              |             | 0.638 | Cluster 11A<br>Size: 47<br>Matches: 14 | 0.41           | Open Jmol   | Open Jmol           | Info |        |
| ARYLES<br>RASE                   |        | GLY 65 A<br>HIS 283 A<br>ASN 106 A                                                                                                                                                                   | GLY 49 A<br>HIS 187 A<br>ASN 90 A                                                                                                                                                                    | SER 10 A<br>GLY 50 A<br>ASN 90 A                           | 6         |              |             | 0.908 | Cluster 11A<br>Size: 47<br>Matches: 14 | 0.38           | Open Jmol   | Open Jmol           | Info |        |

JMol - Alignment id: 1 - 1esc-1ESE - Supe...

localhost:8080/LIBRAWA/getJmol.do?resultId=234&i=1esc&k=1ESE&



(5)

**Fig. 2.** Screenshot of the panel showing the detailed results for a recognition job. (1) The input protein's PDB code is reported and the possibility of exporting the results in LIBRA+ .alg file format is provided. (2) The values of the input parameters used for the given execution are recapped. (3) Filters are in place for the user's convenience when browsing the results obtained; results can be filtered by known protein, ligand and "core" ligand of a cluster. (4) The results are shown in a table which can be re-ordered as needed by clicking on each column's header. Further information is displayed by hovering the mouse over the known protein and ligand, such as the known protein's PDB ID and ligand's full name, respectively, as well as over the "Cluster" information, where all the records falling into the same clusters are shown (as depicted in the screenshot). For each record, via the Jmol HTML 5 plug-in, three-dimensional representations can be visualized, either showing (i) the input protein with its aligned residues highlighted, upon which the corresponding active site from the known protein is superimposed by means of roto-translations of its residues (as exemplified in the screenshot), or (ii) the known protein where the residues from its binding/active site are highlighted instead. Additional information on the aligned protein from each record, including a reference and PubMed ID of the related literature describing the protein's structure, can be found by clicking on "Info", which opens a corresponding pop-up window. Coloured circles in the right side of results panel represent the "Confidence" indicator as detailed in the text, with green circles characterizing high-confidence results.

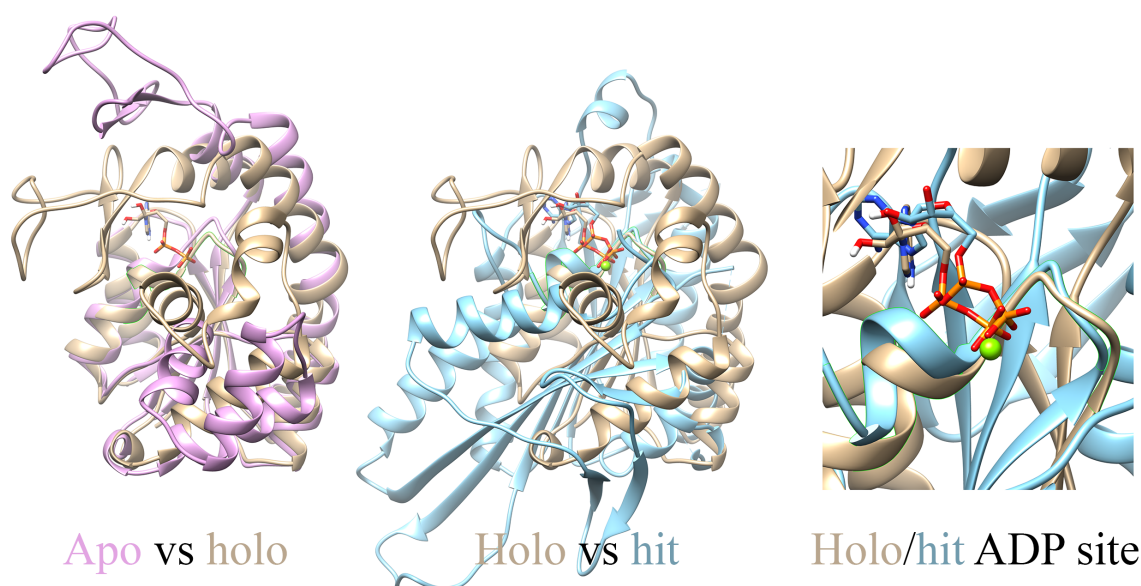

**Fig. 3.** Left panel. Superimposition of the *E. coli* adenylate kinase in the apo (PDB code 4AKE) and the holo ADP-bound (PDB code 2ECK) form. Note the large conformational change occurring upon ADP binding. Central panel. Superimposition of the ADP-bound structures of the *E. coli* adenylate kinase and the human kinesin-8 motor domain (PDB code 3LRE). Note the lack of structural similarity between the two proteins, paralleled by a lack of significant sequence identity (see text for details). Right panel. Detail of the ADP binding site of the two proteins. Note the good superimposition of the ADP molecules and the local structural similarity of a portion of the  $\alpha$  helix and the connected loop hosting the ADP binding site in both proteins (circled in red).

## 2 SUPPLEMENTARY RESULTS

The effectiveness of LIBRA-WA, and in particular the performance improvement with respect to LIBRA due to the novel scoring mechanism, has been evaluated using the LigaSite set of 373 apo-proteins as a test set. As shown in Table 1 LIBRA-WA finds the biologically relevant ligand/binding site in ~96% of the cases. More importantly, the correct ligand/binding site ranks first in almost all of these cases. In detail, the correct hit is a substrate/substrate analog in 35% of the cases, a specific inhibitor in 16% of the cases, a product/product analog in 13% of the cases, a cofactor/cofactor analog in 13% of the cases, a specific ligand other than the above mentioned categories in 15% of the cases and a transition state analog/reaction intermediate in 3% of the cases. It must be remarked that this performance is in many cases independent from the sequence/structure similarity between the input protein and the holo protein from which the known binding site has been extracted. As already mentioned in the main text, one example of this performance is *E. coli* adenylate kinase (apoprotein PDB code 4AKE) which, upon ADP binding undergoes a large conformational change. As a consequence, LIBRA-WA does not identify the ADP binding site of the corresponding holo protein (PDB code 2ECK) as a correct match. Nonetheless, it correctly identifies the ADP binding site in the input apo protein by virtue of the local, structural similarity with the ADP binding site of the human kinesin-8 motor domain (PDB code 3LRE) which shares a mere 11% sequence identity with the *E. coli* adenylate kinase and practically no significant similarity in the overall protein topology (Figure 3). This observation suggests the possibility to exploit the ligand binding sites database, developed to be used with LIBRA-WA, to analyze if there are common, local structural determinants which govern the binding of specific ligands to different proteins, a possibility which will be explored as one of

the future perspectives of this work. Detailed results of the tests performed on the LigaSite set are reported in Table 1. Even removing from the database the holo-proteins present in the LigaSite set, the application still performs fairly well. In fact, LIBRA-WA still identifies a biologically relevant ligand in 88% of the cases, with the correct ligand ranking first in 80% of the cases (Table 4).

For comparative purposes, LIBRA-WA, SiteSeer (Laskowski *et al.*, 2005a,b) and the COACH meta-server (Yang *et al.*, 2013; Roy *et al.*, 2012; Brylinski and Skolnick, 2008; Capra *et al.*, 2009) have been tested on a set of 30 apo-proteins randomly chosen from LigaSite. As it can be seen from Table 2, LIBRA-WA finds a correct solution in 97% of the cases (29 out of 30) as opposed to a success rate of 87% for SiteSeer and 90% for COACH meta-server. Particularly interesting is LIBRA-WA's performance in comparison to COACH meta-server as the latter incorporates the results of several different sequence-based and structure-based algorithms (TM-Site, S-Site, COFACTOR, FINDSITE and ConCavity), while LIBRA-WA is, by design, exclusively structure-based; incidentally, COACH meta-server was ranked as the best method in the weekly CAMEO ligand Binding Site Prediction Experiments (Haas *et al.*, 2013). This observation has prompted a more extensive comparison of LIBRA-WA's performance with respect to COACH. For this purpose, COACH's performance has been evaluated on the entire LigaSite test set. The results, shown in Table 3, indicate that COACH performs slightly better than LIBRA-WA as it finds a biologically relevant ligand in 98% of the cases (versus the 96% success rate of LIBRA-WA). However, the correct result found by COACH ranks first only in 90% of the cases (versus the 94% performance of LIBRA-WA). This is a very good result for LIBRA-WA, given its exclusively structure-based approach and the presence of only small molecules and ions in its database, as opposed to COACH's

database which contains also peptides and nucleic acids. In the light of these extensive tests, it can be stated that LIBRA-WA achieves a performance which is comparable to that of the COACH meta-server.

Table 1: LIBRA-WA's ligand/binding site recognition performance on the LigoSite non-redundant dataset containing 373 apo-proteins for which a corresponding holo structure is available (Desailly *et al.*, 2008). APO and HOLO Protein ID are the PDB codes of the corresponding three-dimensional structures. Ligand ID is the ligand name abbreviation used in the Protein Data Bank.

| APO Protein ID | HOLO Protein ID | Ligand ID | Rank            | rmsd (Å) | Ligand details         |
|----------------|-----------------|-----------|-----------------|----------|------------------------|
| 180L           | 186L            | N4B       | 1 <sup>st</sup> | 0.485    | Specific ligand analog |
| 1A4U           | 1B2L            | NDC       | 1 <sup>st</sup> | 0.664    | Cofactor analog        |
| 1ADE           | 1HOP            | GCP       | 1 <sup>st</sup> | 1.023    | Substrate analog       |
| 1AK1           | 1C9E            | MP1       | 1 <sup>st</sup> | 0.89     | Substrate analog       |
| 1AKZ           | 3FCK            | FCK       | 1 <sup>st</sup> | 0.593    | Specific inhibitor     |
| 1ARB           | 4NSV            | 2OY       | 1 <sup>st</sup> | 0.324    | Specific inhibitor     |
| 1ARL           | 3FVL            | BHK       | 1 <sup>st</sup> | 0.533    | Specific inhibitor     |
| 1B8E           | 3UEX            | STE       | 1 <sup>st</sup> | 0.791    | Specific ligand        |
| 1B8P           | 1B8U            | NAD       | 1 <sup>st</sup> | 0.558    | Cofactor               |
| 1BD9           | 2B7A            | OPE       | 1 <sup>st</sup> | 0.648    | Natural ligand analog  |
| 1BK7           | 1UCD            | U5P       | 1 <sup>st</sup> | 0.456    | Reaction product       |
| 1BKZ           | 4UW6            | VV7       | 1 <sup>st</sup> | 0.512    | Natural ligand         |
| 1BQC           | 2MAN            | MAN       | 1 <sup>st</sup> | 0.545    | Reaction product       |
| 1BY1           | 1DAG            | ACP       | 1 <sup>st</sup> | 0.857    | Substrate analog       |
| 1C48           | 1CQF            | GAL       | 1 <sup>st</sup> | 0.69     | Natural ligand         |
| 1C5H           | 2B46            | XYP       | 1 <sup>st</sup> | 0.434    | Reaction product       |
| 1CEO           | 1CEN            | BGC       | 1 <sup>st</sup> | 0.672    | Substrate analog       |
| 1CEX           | 1OXM            | TC4       | 1 <sup>st</sup> | 0.484    | Covalent inhibitor     |
| 1CPJ           | 2DC7            | 042       | 1 <sup>st</sup> | 0.654    | Covalent inhibitor     |
| 1CRW           | 2B4R            | NAD       | 1 <sup>st</sup> | 0.729    | Cofactor               |
| 1CWY           | 1ESW            | ACR       | 1 <sup>st</sup> | 0.543    | Specific inhibitor     |
| 1DCO           | 1DCP            | HBI       | 1 <sup>st</sup> | 0.713    | Cofactor analog        |
| 1DHN           | 2NM3            | MPU       | 1 <sup>st</sup> | 0.622    | Substrate analog       |
| 1DQ0           | 4P9W            | R3M       | 1 <sup>st</sup> | 0.726    | Specific ligand analog |
| 1DUP           | 1DUD            | DUD       | 1 <sup>st</sup> | 0.402    | Substrate analog       |
| 1E4F           | 4A2B            | AGS       | 1 <sup>st</sup> | 0.817    | Substrate analog       |
| 1E5L           | 1ESQ            | NDP       | 1 <sup>st</sup> | 0.887    | Cofactor               |
| 1E8Y           | 3L13            | JZW       | 1 <sup>st</sup> | 0.582    | Specific inhibitor     |
| 1EDQ           | 1X6N            | AO3       | 1 <sup>st</sup> | 0.444    | Specific inhibitor     |
| 1EPA           | 1EPB            | REA       | 1 <sup>st</sup> | 0.711    | Natural ligand         |
| 1EWZ           | 2WGI            | PNM       | 1 <sup>st</sup> | 0.936    | Specific inhibitor     |
| 1EY0           | 1A2T            | THP       | 1 <sup>st</sup> | 0.937    | Specific inhibitor     |
| 1EZI           | 1EYR            | CDP       | 1 <sup>st</sup> | 0.847    | Substrate analog       |
| 1F14           | 1F17            | NAI       | 1 <sup>st</sup> | 0.409    | Cofactor               |
| 1F1S           | 2BRP            | SIE       | 1 <sup>st</sup> | 0.509    | Specific inhibitor     |
| 1F2V           | 1I1H            | COJ       | 1 <sup>st</sup> | 0.665    | Reaction product       |
| 1F41           | 1DVS            | STL       | 1 <sup>st</sup> | 0.593    | Specific inhibitor     |
| 1F5Z           | 4IMF            | SI3       | 1 <sup>st</sup> | 0.723    | Substrate              |
| 1FCQ           | 1FCV            | NAG       | 1 <sup>st</sup> | 0.7      | Substrate fragment     |
| 1FGB           | 1JQY            | A32       | 1 <sup>st</sup> | 0.883    | Specific inhibitor     |
| 1FO9           | 2APC            | UDM       | 1 <sup>st</sup> | 0.863    | Substrate analog       |
| 1FSF           | 1HOR            | AGP       | 1 <sup>st</sup> | 0.673    | Specific inhibitor     |
| 1FTF           | 1FTH            | A3P       | 1 <sup>st</sup> | 0.64     | Reaction product       |
| 1FTR           | 2FHJ            | MFN       | 1 <sup>st</sup> | 0.558    | Cofactor               |
| 1FWL           | 1H72            | ANP       | 1 <sup>st</sup> | 0.66     | Substrate analog       |
| 1G40           | 1RID            | IDS       | 1 <sup>st</sup> | 1.783    | Natural ligand         |

|      |      |     |                 |       |                       |
|------|------|-----|-----------------|-------|-----------------------|
| 1G4E | 1G4S | TPS | 1 <sup>st</sup> | 0.428 | Reaction product      |
| 1G95 | 1G97 | UD1 | 1 <sup>st</sup> | 0.879 | Reaction product      |
| 1GBS | 1LSP | BUL | 1 <sup>st</sup> | 0.716 | Specific inhibitor    |
| 1GCE | 1GA0 | DVR | 1 <sup>st</sup> | 0.604 | Specific inhibitor    |
| 1GFS | 1FXS | NAP | 1 <sup>st</sup> | 0.524 | Reaction product      |
| 1GOU | 1GOY | 3GP | 1 <sup>st</sup> | 1.017 | Substrate analog      |
| 1GSH | 1GSA | GSH | 1 <sup>st</sup> | 0.773 | Reaction product      |
| 1GWK | 1W8U | BMA | 1 <sup>st</sup> | 1.254 | Natural ligand        |
| 1GY0 | 1OG1 | TAD | 1 <sup>st</sup> | 0.57  | Substrate analog      |
| 1HK9 | 3QO3 | ATP | 1 <sup>st</sup> | 0.362 | Natural ligand        |
| 1HKA | 3UDV | JIC | 1 <sup>st</sup> | 0.592 | Substrate analog      |
| 1HM5 | 4QFH | G6P | 1 <sup>st</sup> | 1.003 | Reaction product      |
| 1HNK | 1HNJ | MLC | 1 <sup>st</sup> | 0.8   | Substrate             |
| 1HO1 | 1HO4 | PXP | 1 <sup>st</sup> | 0.482 | Reaction product      |
| 1I7N | 1I7L | ATP | 1 <sup>st</sup> | 1.263 | Endogenous ligand     |
| 1IAD | 1QJI | PKF | 1 <sup>st</sup> | 0.575 | Specific inhibitor    |
| 1ILV | 1J9K | WO4 | 1 <sup>st</sup> | 0.817 | Specific inhibitor    |
| 1INL | 1JQ3 | AAT | 1 <sup>st</sup> | 0.309 | Substrate analog      |
| 1J85 | 1MXI | SAH | 1 <sup>st</sup> | 0.686 | Cofactor              |
| 1J8S | 1J8R | GLA | 1 <sup>st</sup> | 0.179 | Endogenous ligand     |
| 1JCF | 1JCG | ANP | 1 <sup>st</sup> | 0.528 | Substrate analog      |
| 1JKS | 1IG1 | ANP | 1 <sup>st</sup> | 0.568 | Substrate analog      |
| 1JXO | 1JXM | MPD | 1 <sup>st</sup> | 0.434 | Non-specific ligand   |
| 1JYK | 1JYL | CDC | 1 <sup>st</sup> | 0.701 | Reaction product      |
| 1K0M | 1K0N | GSH | 1 <sup>st</sup> | 0.87  | Substrate             |
| 1K3O | 4HJ2 | LZ6 | 1 <sup>st</sup> | 0.66  | Substrate analog      |
| 1K6A | 1B30 | XYP | 1 <sup>st</sup> | 0.449 | Reaction product      |
| 1KAM | 1KAQ | DND | 1 <sup>st</sup> | 1.517 | Substrate             |
| 1KF5 | 1QHC | PUA | 1 <sup>st</sup> | 0.802 | Reaction product      |
| 1KHD | 1KGZ | PRP | 1 <sup>st</sup> | 0.932 | Substrate             |
| 1KN9 | 1B12 | 1PN | 1 <sup>st</sup> | 0.677 | Specific inhibitor    |
| 1KPA | 1KPE | ADW | 1 <sup>st</sup> | 0.457 | Substrate analog      |
| 1KWB | 1EIR | BPY | 1 <sup>st</sup> | 0.406 | Substrate             |
| 1L7D | 1XLT | NAD | 1 <sup>st</sup> | 1.049 | Substrate             |
| 1LBV | 1LBZ | FBP | 1 <sup>st</sup> | 0.801 | Substrate             |
| 1LCI | 3RIX | 923 | 1 <sup>st</sup> | 0.695 | Specific Inhibitor    |
| 1LF4 | 1LF3 | EH5 | 1 <sup>st</sup> | 0.541 | Specific Inhibitor    |
| 1LTU | 1LTZ | HBI | 1 <sup>st</sup> | 0.412 | Cofactor              |
| 1MIZ | 1MB9 | ATP | 1 <sup>st</sup> | 0.753 | Substrate             |
| 1MKB | 4KEH | 1r3 | 1 <sup>st</sup> | 0.59  | Substrate analog      |
| 1MMI | 3QSB | 743 | 1 <sup>st</sup> | 0.555 | Specific inhibitor    |
| 1MR7 | 1KK4 | ACO | 1 <sup>st</sup> | 0.544 | Substrate             |
| 1MTZ | 1MU0 | PHK | 1 <sup>st</sup> | 0.632 | Specific inhibitor    |
| 1MWK | 4A61 | ANP | 1 <sup>st</sup> | 0.985 | Substrate analog      |
| 1MZL | 1FK4 | STE | 1 <sup>st</sup> | 0.697 | Natural ligand        |
| 1N05 | 1N07 | FMN | 1 <sup>st</sup> | 1.144 | Reaction intermediate |
| 1NDB | 2H3P | ACO | 1 <sup>st</sup> | 0.559 | Substrate             |
| 1NON | 1XZ8 | 5GP | 1 <sup>st</sup> | 0.439 | Substrate analog      |
| 1NXM | 2IXL | TRH | 1 <sup>st</sup> | 0.684 | Substrate analog      |
| 1O24 | 1KQ4 | FAD | 1 <sup>st</sup> | 0.501 | Cofactor              |
| 1OEM | 3EAX | LZP | 1 <sup>st</sup> | 0.827 | Specific inhibitor    |

|      |      |     |                 |       |                               |
|------|------|-----|-----------------|-------|-------------------------------|
| 1OFP | 1OF6 | DTY | 1 <sup>st</sup> | 0.906 | Specific inhibitor            |
| 1OGH | 1PKJ | DUT | 1 <sup>st</sup> | 0.575 | Substrate                     |
| 1OGL | 2YB0 | DUR | 1 <sup>st</sup> | 0.82  | Substrate analog              |
| 1OGM | 1OGO | GLC | 1 <sup>st</sup> | 0.503 | Reaction product              |
| 1OJQ | 1OJZ | NAD | 1 <sup>st</sup> | 0.877 | Cofactor                      |
| 1OLZ | 3OL2 | NAG | 1 <sup>st</sup> | 0.524 | Sugar chain                   |
| 1OOI | 2GTE | VA  | 1 <sup>st</sup> | 0.532 | Natural ligand                |
| 1OPY | 3OWY | EQU | 1 <sup>st</sup> | 0.698 | Transition state analog       |
| 1OXT | 1OXV | ANP | 1 <sup>st</sup> | 0.534 | Reaction product              |
| 1P1X | 1JCJ | HPD | 1 <sup>st</sup> | 0.418 | Reaction intermediate         |
| 1P5H | 1T3Z | CAO | 1 <sup>st</sup> | 0.838 | Substrate analog              |
| 1P74 | 3PHJ | DHK | 1 <sup>st</sup> | 1.024 | Reaction product              |
| 1PDB | 1BOZ | NDP | 1 <sup>st</sup> | 0.938 | Cofactor                      |
| 1PNG | 1PNF | NDG | 1 <sup>st</sup> | 0.458 | Substrate analog              |
| 1Q52 | 1Q51 | CAA | 1 <sup>st</sup> | 0.81  | Substrate analog              |
| 1Q7M | 1Q8J | C2F | 1 <sup>st</sup> | 0.744 | Substrate analog              |
| 1QCZ | 2FWP | ICR | 1 <sup>st</sup> | 0.685 | Substrate                     |
| 1QID | 1H23 | E12 | 1 <sup>st</sup> | 0.322 | Specific inhibitor            |
| 1QTO | 1JIF | BLM | 1 <sup>st</sup> | 0.703 | Natural ligand                |
| 1QTR | 1X2B | STX | 1 <sup>st</sup> | 0.415 | Specific inhibitor            |
| 1R0M | 1XPY | NLQ | 1 <sup>st</sup> | 0.398 | Substrate                     |
| 1R12 | 3ZWP | AVU | 1 <sup>st</sup> | 0.601 | Substrate analog              |
| 1R29 | 4CP3 | RBT | 1 <sup>st</sup> | 0.761 | Specific inhibitor            |
| 1R15 | 2HV9 | SFG | 1 <sup>st</sup> | 0.301 | Specific inhibitor            |
| 1RIQ | 3HXQ | ASA | 1 <sup>st</sup> | 0.873 | Substrate analog              |
| 1RJ1 | 2CJ7 | IOD | 1 <sup>st</sup> | 0.105 | Non-specific ligand           |
| 1RKM | 2RKM | LYS | 4 <sup>th</sup> | 1.029 | Specific ligand               |
| 1RZV | 1RZU | ADP | 1 <sup>st</sup> | 0.655 | Reaction product analog       |
| 1S2L | 1S2D | AR4 | 1 <sup>st</sup> | 0.396 | Substrate analog              |
| 1S7K | 1S7L | COA | 1 <sup>st</sup> | 0.861 | Reaction product              |
| 1SGK | 1DDT | APU | 1 <sup>st</sup> | 0.561 | Substrate analog              |
| 1SGZ | 3I25 | MV7 | 1 <sup>st</sup> | 0.657 | Specific inhibitor            |
| 1SJY | 1S23 | GNP | 1 <sup>st</sup> | 0.121 | Product analog                |
| 1SNT | 1VCU | DAN | 1 <sup>st</sup> | 0.938 | Specific inhibitor            |
| 1SQG | 1SQF | SAM | 1 <sup>st</sup> | 0.723 | Cofactor                      |
| 1SUL |      |     |                 |       | <b>No significant results</b> |
| 1SWH | 3WZP | ZOF | 1 <sup>st</sup> | 0.715 | Specific ligand analog        |
| 1TGN | 1C2F | BAH | 1 <sup>st</sup> | 0.887 | Specific inhibitor            |
| 1THV | 4TVT | NA  | 2 <sup>nd</sup> | 0.162 | Non-specific ligand           |
| 1TIB | 1GT6 | OLA | 1 <sup>st</sup> | 0.874 | Reaction product              |
| 1TJE | 1TKY | A3S | 1 <sup>st</sup> | 0.346 | Substrate analog              |
| 1TJV | 1TJW | AS1 | 1 <sup>st</sup> | 0.834 | Substrate analog              |
| 1TVN | 4A3H | DCB | 1 <sup>st</sup> | 1.021 | Substrate analog              |
| 1TW0 | 1TXC | 2AN | 1 <sup>st</sup> | 0.671 | Non-specific ligand           |
| 1TYF | 2FZS | CMQ | 1 <sup>st</sup> | 0.508 | Specific inhibitor            |
| 1TYV | 3TH0 | PZU | 1 <sup>st</sup> | 0.632 | Natural ligand analog         |
| 1TZV | 1TZX | CIT | 1 <sup>st</sup> | 0.987 | Specific ligand analog        |
| 1U0T | 1Y3I | NAD | 1 <sup>st</sup> | 1.315 | Substrate                     |
| 1U7U | 1U7Z | PMT | 1 <sup>st</sup> | 0.83  | Substrate analog              |
| 1UAJ | 1P9P | SAH | 1 <sup>st</sup> | 0.701 | Substrate analog              |
| 1UBI | 4WZP | SEP | 1 <sup>st</sup> | 1.045 | Specific ligand               |
| 1UF4 | 1UF5 | CDT | 1 <sup>st</sup> | 0.287 | Substrate                     |



|      |      |     |                 |       |                               |
|------|------|-----|-----------------|-------|-------------------------------|
| 1ULU | 2WYV | NAD | 1 <sup>st</sup> | 0.444 | Cofactor                      |
| 1UMF | 1UM0 | FMN | 1 <sup>st</sup> | 0.465 | Cofactor                      |
| 1UXZ | 1UZ0 | BGC | 1 <sup>st</sup> | 0.337 | Specific ligand               |
| 1UYL | 3T0Z | ATP | 1 <sup>st</sup> | 0.934 | Substrate                     |
| 1V0S | 2ZE9 | PD7 | 1 <sup>st</sup> | 0.335 | Reaction product              |
| 1V6Z | 2CX8 | SAH | 1 <sup>st</sup> | 0.626 | Cofactor analog               |
| 1V77 | 2CZV | ACY | 1 <sup>st</sup> | 0.357 | Non-specific ligand           |
| 1VFJ | 1V9O | ADP | 1 <sup>st</sup> | 0.643 | Specific ligand               |
| 1VIC | 1H7H | CDP | 1 <sup>st</sup> | 1.172 | Substrate analog              |
| 1VJU | 3DWR | 0PA | 1 <sup>st</sup> | 0.671 | Substrate analog              |
| 1VPN | 1VPS | SIA | 1 <sup>st</sup> | 0.62  | Specific ligand               |
| 1W9A | 4QVB | F42 | 1 <sup>st</sup> | 0.741 | Cofactor                      |
| 1WJG | 2Z08 | ATP | 1 <sup>st</sup> | 0.987 | Specific ligand               |
| 1WNY | 1WNZ | 2VA | 1 <sup>st</sup> | 0.6   | Substrate analog              |
| 1WOS | 1WOP | FFO | 1 <sup>st</sup> | 0.551 | Substrate analog              |
| 1WS9 | 2D29 | FAD | 1 <sup>st</sup> | 0.327 | Cofactor                      |
| 1WTJ | 2CWF | NDP | 1 <sup>st</sup> | 0.457 | Cofactor                      |
| 1WXF | 1EE1 | ATP | 1 <sup>st</sup> | 0.556 | Substrate analog              |
| 1X56 | 1X55 | NSS | 1 <sup>st</sup> | 0.713 | Substrate analog              |
| 1X70 | 1X7P | SAM | 1 <sup>st</sup> | 0.534 | Cofactor                      |
| 1X8F | 1X6U | DO8 | 1 <sup>st</sup> | 0.457 | Reaction product              |
| 1XIX | 1P4N | UMA | 1 <sup>st</sup> | 0.225 | Substrate                     |
| 1XK7 | 1XA4 | COA | 1 <sup>st</sup> | 0.569 | Substrate analog              |
| 1XO6 | 1XNY | 191 | 1 <sup>st</sup> | 0.548 | Substrate                     |
| 1XQO | 1XQP | 8HG | 1 <sup>st</sup> | 0.575 | Substrate analog              |
| 1XW2 | 2B4F | XYP | 1 <sup>st</sup> | 0.381 | Reaction product              |
| 1Y2Q | 3PD2 | A3S | 1 <sup>st</sup> | 0.817 | Substrate analog              |
| 1Y2T | 20FD | NGA | 1 <sup>st</sup> | 0.896 | Endogenous ligand             |
| 1YBT | 1YBU | APC | 1 <sup>st</sup> | 1.21  | Substrate analog              |
| 1YVY | 1YTM | ATP | 1 <sup>st</sup> | 0.994 | Substrate                     |
| 1Z7G | 4RAB | 3L3 | 1 <sup>st</sup> | 0.872 | Specific inhibitor            |
| 1ZAH | 3TU9 | 5MM | 1 <sup>st</sup> | 0.319 | Specific inhibitor            |
| 1ZCU | 1ZDF | UPG | 1 <sup>st</sup> | 0.305 | Substrate                     |
| 1ZNW | 1ZNX | 5GP | 1 <sup>st</sup> | 0.279 | Substrate                     |
| 1ZTY | 1ZU0 | CBS | 1 <sup>st</sup> | 0.815 | Natural ligand                |
| 1ZUH | 3MUF | ADP | 1 <sup>st</sup> | 1.294 | Reaction product              |
| 2A6Z |      |     |                 |       | <b>No significant results</b> |
| 2A8F | 1LRI | CLR | 1 <sup>st</sup> | 0.897 | Specific ligand               |
| 2AD1 | 1BO6 | VO4 | 2 <sup>nd</sup> | 0.713 | Transition state analog       |
| 2AHF | 2AHG | UCD | 1 <sup>st</sup> | 0.617 | Substrate                     |
| 2AHU | 2AHV | COA | 1 <sup>st</sup> | 0.862 | Cofactor                      |
| 2AMJ | 2B3D | FAD | 1 <sup>st</sup> | 0.449 | Cofactor                      |
| 2B0J | 3F46 | I2C | 1 <sup>st</sup> | 0.68  | Cofactor                      |
| 2B6P | 1YMG | BNG | 1 <sup>st</sup> | 0.152 | Non-specific ligand           |
| 2B78 | 3LDF | SAH | 1 <sup>st</sup> | 0.405 | Cofactor                      |
| 2B98 | 2B99 | RDL | 1 <sup>st</sup> | 0.53  | Substrate analog inhibitor    |
| 2BGT | 1J39 | UPG | 1 <sup>st</sup> | 0.96  | Substrate                     |
| 2BJW | 2C96 | ATP | 1 <sup>st</sup> | 0.593 | Substrate                     |
| 2BOE | 2BOD | BGC | 1 <sup>st</sup> | 0.267 | Reaction product              |
| 2C61 | 3B2Q | ATP | 1 <sup>st</sup> | 0.592 | Reaction product              |
| 2C7I | 2ARU | ATP | 1 <sup>st</sup> | 0.555 | Substrate                     |
| 2CAR | 2J4E |     |                 |       | <b>No significant results</b> |

|      |      |     |                  |       |                                   |
|------|------|-----|------------------|-------|-----------------------------------|
| 2CHS | 1COM | PRE | 1 <sup>st</sup>  | 0.599 | Reaction product                  |
| 2CI3 | 2CI1 | KOR | 1 <sup>st</sup>  | 0.654 | Specific inhibitor                |
| 2CWK | 2DY9 | ADP | 1 <sup>st</sup>  | 0.678 | Substrate                         |
| 2CX5 | 2Z0X | 5CA | 1 <sup>st</sup>  | 0.717 | Substrate analog                  |
| 2D59 | 2D5A | COA | 1 <sup>st</sup>  | 0.681 | Natural ligand                    |
| 2DHQ | 3N76 | CA2 | 1 <sup>st</sup>  | 0.515 | Specific inhibitor                |
| 2DJ6 | 2DTT | H4B | 1 <sup>st</sup>  | 0.84  | Substrate analog                  |
| 2DKA | 2DKC | 16G | 1 <sup>st</sup>  | 0.814 | Substrate                         |
| 2DPS | 2DPT | PUY | 1 <sup>st</sup>  | 0.532 | Substrate analog                  |
| 2DQW | 1EYE | PMM | 1 <sup>st</sup>  | 0.982 | Substrate analog                  |
| 2E0C | 2E5M | NAP | 1 <sup>st</sup>  | 0.722 | Substrate                         |
| 2E0K | 2E0N | SAH | 1 <sup>st</sup>  | 0.721 | Cofactor                          |
| 2E10 | 1WQW | BT5 | 1 <sup>st</sup>  | 0.409 | Substrate analog                  |
| 2E1V | 2E1T | MLC | 1 <sup>st</sup>  | 0.449 | Substrate                         |
| 2E3S | 2E3O | 16C | 1 <sup>st</sup>  | 0.739 | Substrate                         |
| 2ECR | 2ED4 | FAD | 1 <sup>st</sup>  | 0.556 | Substrate                         |
| 2EX0 | 2IIQ | C5P | 1 <sup>st</sup>  | 0.583 | Substrate analog                  |
| 2F82 | 2FA0 | HMG | 1 <sup>st</sup>  | 0.713 | Reaction product                  |
| 2F9T | 2F9W | PAU | 1 <sup>st</sup>  | 0.565 | Substrate                         |
| 2FK7 | 3HA7 | B32 | 1 <sup>st</sup>  | 0.49  | Specific inhibitor                |
| 2FP8 | 2V91 | S55 | 1 <sup>st</sup>  | 0.691 | Substrate                         |
| 2FSF | 2FSH | ANP | 1 <sup>st</sup>  | 0.51  | Substrate analog                  |
| 2G67 | 2G25 | TZK | 1 <sup>st</sup>  | 0.775 | Reaction intermediate analog      |
| 2G95 | 3G8E | IS1 | 1 <sup>st</sup>  | 0.88  | Specific inhibitor                |
| 2GFV | 2GFX | PMN | 1 <sup>st</sup>  | 0.414 | Specific inhibitor                |
| 2GG4 | 1RF6 | S3P | 1 <sup>st</sup>  | 1.113 | Substrate                         |
| 2GQV | 2P4T | NAP | 4 <sup>th</sup>  | 0.86  | Cofactor                          |
| 2GSF | 4P5Z | Q7M | 1 <sup>st</sup>  | 0.924 | Specific inhibitor                |
| 2GT2 | 2GT4 | GDD | 1 <sup>st</sup>  | 0.623 | Substrate                         |
| 2GUB | 4QDW | LAI | 1 <sup>st</sup>  | 0.696 | Reaction intermediate             |
| 2GWX | 3GWX | EPA | 1 <sup>st</sup>  | 0.776 | Natural ligand                    |
| 2GYY | 2GZ1 | NAP | 1 <sup>st</sup>  | 0.709 | Cofactor                          |
| 2H2Z | 2A5K | AZP | 1 <sup>st</sup>  | 0.74  | Inhibitor                         |
| 2HBJ | 2HBL | AMP | 1 <sup>st</sup>  | 0.423 | Reaction product                  |
| 2HIV | 2HIX | ATP | 1 <sup>st</sup>  | 0.988 | Substrate                         |
| 2HK0 | 3VNL | TAG | 1 <sup>st</sup>  | 0.357 | Substrate                         |
| 2HVM | 1LLO | AMI | 1 <sup>st</sup>  | 0.304 | Specific inhibitor                |
| 2HY7 | 2Q6V | UDP | 1 <sup>st</sup>  | 0.966 | Substrate analog/reaction product |
| 2HZR | 2HZQ | STR | 1 <sup>st</sup>  | 0.589 | Natural ligand                    |
| 2I4L | 2I4M | PSD | 1 <sup>st</sup>  | 0.644 | Substrate                         |
| 2IOB | 3A2Y | TS5 | 1 <sup>st</sup>  | 0.882 | Substrate                         |
| 2IRU | 2IRX | GTP | 1 <sup>st</sup>  | 1.127 | Substrate                         |
| 2J71 | 2J72 | GLC | 10 <sup>th</sup> | 1.18  | Natural ligand                    |
| 2J8N | 3DR8 | ACO | 1 <sup>st</sup>  | 0.836 | Cofactor                          |
| 2JBR | 2JBS | FMN | 1 <sup>st</sup>  | 0.608 | Substrate                         |
| 2NWD | 4XAD | 3ZW | 1 <sup>st</sup>  | 0.722 | Substrate analog                  |
| 2NXC | 3CJT | SAM | 1 <sup>st</sup>  | 0.374 | Cofactor                          |
| 2O9P | 2Z1S | CTT | 1 <sup>st</sup>  | 0.403 | Substrate                         |
| 2OAM | 2OA1 | FAD | 1 <sup>st</sup>  | 0.587 | Cofactor                          |
| 2OPT | 3B6A | ZCT | 1 <sup>st</sup>  | 0.959 | Specific inhibitor                |
| 2OU1 | 4JGX | PLM | 1 <sup>st</sup>  | 2.203 | Natural ligand                    |
| 2OVE | 2OVD | DAO | 1 <sup>st</sup>  | 0.695 | Specific ligand                   |

|      |      |     |                  |       |                             |
|------|------|-----|------------------|-------|-----------------------------|
| 2PAW | 4HHY | 15R | 1 <sup>st</sup>  | 0.694 | Specific inhibitor          |
| 2PFK | 1PFK | ADP | 1 <sup>st</sup>  | 1.001 | Reaction product            |
| 2PKF | 4OIG | AGS | 1 <sup>st</sup>  | 0.471 | Substrate analog            |
| 2PPN | 1BL4 | AP1 | 1 <sup>st</sup>  | 0.916 | Specific ligand             |
| 2Q5R | 2JGV | ADP | 1 <sup>st</sup>  | 0.762 | Reaction product            |
| 2Q6Z | 1R3Q | ACP | 1 <sup>st</sup>  | 0.796 | Reaction product            |
| 2QBV | 2W1A | TSA | 1 <sup>st</sup>  | 1.193 | Transition state analog     |
| 2QDK | 1RXU | THM | 1 <sup>st</sup>  | 0.595 | Reaction product analog     |
| 2QEV | 2QEO | LNR | 1 <sup>st</sup>  | 0.412 | Natural ligand              |
| 2QSU | 2QTG | MTH | 1 <sup>st</sup>  | 0.574 | Substrate analog            |
| 2QVL | 2QV7 | ADP | 1 <sup>st</sup>  | 0.518 | Reaction product            |
| 2QYS | 2QW8 | NAP | 1 <sup>st</sup>  | 0.432 | Cofactor                    |
| 2R60 | 2R68 | SUP | 1 <sup>st</sup>  | 0.24  | Reaction product            |
| 2RG7 | 1AIJ | BPH | 5 <sup>th</sup>  | 2.363 | Endogenous ligand analog    |
| 2RJD | 3P8H | P8H | 1 <sup>st</sup>  | 0.248 | Specific inhibitor          |
| 2SGA | 2QAA | TYR | 1 <sup>st</sup>  | 0.559 | Reaction intermediate       |
| 2SIL | 2SIM | DAN | 1 <sup>st</sup>  | 0.179 | Specific inhibitor          |
| 2TS1 | 3TS1 | TYA | 1 <sup>st</sup>  | 0.41  | Reaction intermediate       |
| 2UYO | 2UYQ | SAM | 1 <sup>st</sup>  | 0.57  | Cofactor                    |
| 2V78 | 2VAR | ANP | 1 <sup>st</sup>  | 0.494 | Substrate                   |
| 2VFB | 2VFC | COA | 1 <sup>st</sup>  | 0.686 | Cofactor                    |
| 2VFY | 2VFK | AMP | 1 <sup>st</sup>  | 0.904 | Natural ligand              |
| 2VQ4 | 4BFN | GLC | 2 <sup>nd</sup>  | 0.731 | Natural ligand              |
| 2VUA | 2VU9 | GAL | 1 <sup>st</sup>  | 0.197 | Natural ligand              |
| 2WN4 | 2WN6 | NDP | 1 <sup>st</sup>  | 0.768 | Cofactor                    |
| 2WVH | 3OE1 | TDL | 1 <sup>st</sup>  | 0.457 | Reaction intermediate       |
| 2WZT | 2WZM | NA7 | 1 <sup>st</sup>  | 0.928 | Cofactor analog             |
| 2X5S | 2X5Z | GDD | 1 <sup>st</sup>  | 0.829 | Reaction product            |
| 2YWB | 1GPM | AMP | 1 <sup>st</sup>  | 1.03  | Product analog              |
| 2YXF | 1LDS | NA  | 10 <sup>th</sup> | 0.9   | Non-specific ligand         |
| 2YYA | 2YW2 | ATP | 1 <sup>st</sup>  | 0.833 | Substrate                   |
| 2YYT | 2YYU | C5P | 1 <sup>st</sup>  | 0.481 | Product analog              |
| 2YZG | 2YZN | ANP | 1 <sup>st</sup>  | 0.944 | Substrate analog            |
| 2ZBS | 1S9Q | OHT | 1 <sup>st</sup>  | 1.022 | Natural ligand analog       |
| 2ZCG | 2ZA1 | OMP | 1 <sup>st</sup>  | 0.767 | Substrate                   |
| 2ZCO | 3ADZ | PS7 | 1 <sup>st</sup>  | 0.8   | Reaction intermediate       |
| 2ZGL | 2ZGM | LAT | 1 <sup>st</sup>  | 0.398 | Natural ligand analog       |
| 2ZHY | 2ZHZ | ATP | 1 <sup>st</sup>  | 0.707 | Substrate                   |
| 2ZJ8 | 2ZJA | ACP | 1 <sup>st</sup>  | 0.717 | Substrate analog            |
| 2ZTY | 3ZZ9 | G83 | 1 <sup>st</sup>  | 0.645 | Specific inhibitor          |
| 3A0Y | 3A0T | ADP | 1 <sup>st</sup>  | 0.991 | Reaction product            |
| 3A5Q | 1CHW | HXC | 1 <sup>st</sup>  | 0.849 | Substrate analog            |
| 3AAP | 3AAR | ANP | 1 <sup>st</sup>  | 0.793 | Specific inhibitor          |
| 3ADO | 3ADP | NAI | 1 <sup>st</sup>  | 0.632 | Cofactor                    |
| 3APP | 1PPM | 0P1 | 1 <sup>st</sup>  | 0.66  | Specific inhibitor          |
| 3B3G | 2Y1W | SFG | 1 <sup>st</sup>  | 1.05  | Cofactor analog             |
| 3BA1 | 3BAZ | NAP | 1 <sup>st</sup>  | 0.583 | Cofactor                    |
| 3BLM | 1GHP | PNM | 1 <sup>st</sup>  | 0.481 | Reaction intermediate       |
| 3BTV | 3BTS | NAD | 1 <sup>st</sup>  | 0.827 | Specific ligand (activator) |
| 3BUE | 3CAG | ARG | 1 <sup>st</sup>  | 0.855 | Natural ligand              |
| 3BYL | 3BYN | RAF | 1 <sup>st</sup>  | 0.762 | Substrate analog            |
| 3C2E | 3C2V | PHT | 1 <sup>st</sup>  | 0.725 | Specific inhibitor          |

|      |      |     |                  |       |                               |
|------|------|-----|------------------|-------|-------------------------------|
| 3C8N | 3B4Y | F42 | 1 <sup>st</sup>  | 0.656 | Cofactor                      |
| 3CAF | 1E0O | SGN | 1 <sup>st</sup>  | 1.313 | Specific ligand               |
| 3CB6 | 3CB5 | B3P | 30 <sup>th</sup> | 0.735 | Non-specific ligand           |
| 3CGZ | 3CGY | RDC | 1 <sup>st</sup>  | 0.849 | Specific inhibitor            |
| 3COU | 2XSQ | IMP | 1 <sup>st</sup>  | 0.497 | Reaction product              |
| 3CQ1 |      |     |                  |       | <b>No significant results</b> |
| 3CRM | 3CRQ | DPO | 1 <sup>st</sup>  | 0.502 | Reaction product              |
| 3CSR | 3CSZ | NAG | 1 <sup>st</sup>  | 0.249 | Substrate analog              |
| 3CTB | 11LH | SRL | 1 <sup>st</sup>  | 0.816 | Specific agonist              |
| 3D0O | 3D4P | NAD | 1 <sup>st</sup>  | 0.603 | Cofactor                      |
| 3D95 | 3CWK | REA | 1 <sup>st</sup>  | 0.683 | Endogenous ligand             |
| 3DRD | 3DOD | PLP | 1 <sup>st</sup>  | 0.954 | Cofactor                      |
| 3DRE | 3JU6 | ANP | 1 <sup>st</sup>  | 1.295 | Substrate analog              |
| 3DUL | 3DUW | SAH | 1 <sup>st</sup>  | 1.374 | Cofactor                      |
| 3E1S | 2EWV | ADP | 11 <sup>th</sup> | 1.859 | Substrate analog              |
| 3E5B | 3POX | ICT | 1 <sup>st</sup>  | 0.786 | Substrate                     |
| 3EIZ | 3E1Y | POP | 1 <sup>st</sup>  | 1.051 | Substrate                     |
| 3EK6 | 2BND | UDP | 1 <sup>st</sup>  | 1.04  | Reaction product              |
| 3ETF | 3EFV | NAD | 1 <sup>st</sup>  | 0.362 | Cofactor                      |
| 3EX9 | 3B4P | 3B4 | 1 <sup>st</sup>  | 0.528 | Substrate analog              |
| 3EXR | 3EXS | 5RP | 1 <sup>st</sup>  | 0.574 | Product analog                |
| 3FIL | 3FIK | NAP | 1 <sup>st</sup>  | 0.592 | Cofactor                      |
| 3F6F | 3GH6 | GSH | 1 <sup>st</sup>  | 0.217 | Substrate                     |
| 3FTD | 2ZBR | SFG | 1 <sup>st</sup>  | 1.578 | Cofactor analog               |
| 3FV6 | 3FWS | ANP | 1 <sup>st</sup>  | 1.079 | Natural ligand analog         |
| 3G1S | 3G1F | 2OM | 1 <sup>st</sup>  | 0.785 | Substrate analog              |
| 3GBT | 3LL3 | ATP | 1 <sup>st</sup>  | 0.711 | Substrate                     |
| 3GD0 | 3GD9 | BGC | 1 <sup>st</sup>  | 0.527 | Substrate/product analog      |
| 3GLK | 3GID | S1A | 1 <sup>st</sup>  | 0.483 | Specific ligand               |
| 3GPG | 3GPO | APR | 1 <sup>st</sup>  | 0.58  | Specific ligand               |
| 3GQH | 3GQK | ATP | 1 <sup>st</sup>  | 1.385 | Specific ligand               |
| 3GSZ | 3BR9 | DEY | 1 <sup>st</sup>  | 0.547 | Specific inhibitor            |
| 3H2G | 1GKK | SEP | 2 <sup>nd</sup>  | 0.806 | Specific ligand               |
| 3H38 | 3H39 | ATP | 1 <sup>st</sup>  | 0.883 | Substrate                     |
| 3H49 | 3IN1 | ADP | 1 <sup>st</sup>  | 0.624 | Reaction product              |
| 3H71 | 2YA6 | DAN | 1 <sup>st</sup>  | 0.604 | Specific inhibitor            |
| 3HBH | 2DKV | MES | 1 <sup>st</sup>  | 0.938 | Substrate mimic               |
| 3HIS | 3HIV | C2X | 1 <sup>st</sup>  | 0.613 | Transition state analog       |
| 3HJ4 | 3HIY | UTP | 1 <sup>st</sup>  | 0.874 | Substrate                     |
| 3HNX | 3HP8 | SUC | 1 <sup>st</sup>  | 0.546 | Specific ligand               |
| 3I0C | 3V0N | 3GW | 1 <sup>st</sup>  | 0.831 | Specific inhibitor            |
| 3I3I | 1QLL | TDA | 1 <sup>st</sup>  | 0.688 | Specific inhibitor            |
| 3I8S | 3WIC | GNP | 1 <sup>st</sup>  | 1.196 | Substrate analog              |
| 3IK8 | 4TYO | 39X | 1 <sup>st</sup>  | 0.419 | Specific inhibitor            |
| 3ILY |      |     |                  |       | <b>No significant results</b> |
| 3ITY | 3ITV | PSJ | 1 <sup>st</sup>  | 0.523 | Substrate                     |
| 3IUJ | 3IVM | ZPR | 1 <sup>st</sup>  | 0.955 | Specific inhibitor            |
| 3JYL | 3JYN | NDP | 1 <sup>st</sup>  | 0.641 | Cofactor                      |
| 3K0M | 4J5A | 67Z | 1 <sup>st</sup>  | 0.637 | Specific inhibitor            |
| 3KAJ | 3KAL | HGS | 1 <sup>st</sup>  | 0.633 | Reaction product              |
| 3KDH | 3NJ0 | PYV | 1 <sup>st</sup>  | 0.368 | Natural ligand mimic          |

|      |      |     |                 |       |                     |
|------|------|-----|-----------------|-------|---------------------|
| 3KJE | 3KJG | ADP | 1 <sup>st</sup> | 1.123 | Reaction product    |
| 3KJT | 4IKM | TYI | 1 <sup>st</sup> | 0.866 | Modified amino acid |
| 3KP7 | 4EJW | SRY | 1 <sup>st</sup> | 0.969 | Specific inhibitor  |
| 3KR9 | 3KU1 | SAM | 1 <sup>st</sup> | 0.752 | Cofactor            |
| 3KX7 | 3KVU | ACO | 1 <sup>st</sup> | 0.867 | Cofactor            |
| 3LIG | 3LIH | RAF | 1 <sup>st</sup> | 0.331 | Substrate           |
| 3LOI | 3LZZ | GDP | 1 <sup>st</sup> | 0.641 | Specific ligand     |
| 3LXZ | 3PR8 | GSH | 1 <sup>st</sup> | 0.209 | Substrate           |
| 3M4D | 3M4E | BCD | 1 <sup>st</sup> | 0.428 | Natural ligand      |
| 3N6J | 1ECQ | DXG | 1 <sup>st</sup> | 0.636 | Substrate analog    |
| 3NK6 | 3NK7 | SAM | 1 <sup>st</sup> | 0.766 | Cofactor            |
| 3PTE | 1IKG | REX | 1 <sup>st</sup> | 0.49  | Substrate fragment  |
| 3SSW | 1ZT9 | TRP | 1 <sup>st</sup> | 0.577 | Specific ligand     |
| 3VZT | 3VZU | ANP | 1 <sup>st</sup> | 0.381 | Specific ligand     |
| 4AKE | 3LR3 | ADP | 1 <sup>st</sup> | 1.273 | Reaction product    |
| 4PGM | 1E59 | VO3 | 1 <sup>st</sup> | 1.009 | Specific inhibitor  |
| 4PTI | 1YLC | ABA | 1 <sup>st</sup> | 1.003 | Modified amino acid |

Table 2: Comparison of LIBRA-WA, SiteSeer and COACH on their respective ligand/binding site recognition performance, applied on a set of ligand-free proteins randomly chosen from the LigASite. Please note that only the first result provided by each respective system is reported. Wrong results (wrong target protein, ligand not biologically relevant or no results) are highlighted in bold font. Superscript notes for ligands correspond to the following descriptions: 1: Substrate analog; 2: Reaction product; 3: Covalent inhibitor; 4: Cofactor; 5: Specific inhibitor; 6: Substrate; 7: Reaction product analog; 8: Natural ligand analog; 9: Cofactor analog; 10: Reaction intermediate; 11: Natural ligand; 12: Non-specific ligand.

| PDB code | Experimental function and LigA-Site ligand                                                                     | Predicted function (PDB code) and ligand (ligand ID)                                                    |                                                                                                   |                                                                                                                                                             |
|----------|----------------------------------------------------------------------------------------------------------------|---------------------------------------------------------------------------------------------------------|---------------------------------------------------------------------------------------------------|-------------------------------------------------------------------------------------------------------------------------------------------------------------|
|          |                                                                                                                | LIBRA-WA                                                                                                | SiteSeer                                                                                          | COACH server                                                                                                                                                |
| 1AK1     | Ferrochelatase<br>N-methylmesoporphyrin                                                                        | Ferrochelatase (1C9E)<br>N-methylmesoporphyrin (MP1) <sup>1</sup>                                       | Ferrochelatase (1C9E)<br>N-methylmesoporphyrin (MP1) <sup>1</sup>                                 | Ferrochelatase (2HRE)<br>Protoporphyrin IX (PP9) <sup>6</sup>                                                                                               |
| 1BK7     | Ribonuclease MC1<br>Uridine-5'-monophosphate                                                                   | Ribonuclease MC1 (1UCD)<br>Uridine-5'-monophosphate (U5P) <sup>2</sup>                                  | Ribonuclease NW (1IYB)<br>Guanosine-5'-monophosphate (5GP) <sup>2</sup>                           | Ribonuclease NW (1IYB)<br>Guanosine-5'-monophosphate (5GP) <sup>2</sup>                                                                                     |
| 1CEX     | Cutinase<br>Butyl-phosphinic acid 2,3-bis-butylcarbamoyloxy-propyl ester group                                 | Cutinase (1OXM)<br>Butyl-phosphinic acid 2,3-bis-butylcarbamoyloxy-propyl ester (TC4) <sup>3</sup>      | Cutinase (1XZM)<br>N-undecanylphosphonate methyl ester group (DPE) <sup>3</sup>                   | Cutinase (1XZM)<br>N-undecanylphosphonate methyl ester group (DPE) <sup>3</sup>                                                                             |
| 1CRW     | D-Glyceraldehyde-3-phosphate dehydrogenase<br>Nicotinamide-adenine-dinucleotide                                | Glyceraldehyde-3-phosphate dehydrogenase (2B4R)<br>Nicotinamide-adenine-dinucleotide (NAD) <sup>4</sup> | <b>D-Glyceraldehyde-3-phosphate dehydrogenase (1DSS)</b><br><b>Sulfate ion (SO4)<sup>12</sup></b> | Glyceraldehyde-3-phosphate dehydrogenase (4WNC)<br>Nicotinamide-adenine-dinucleotide (NAD) <sup>4</sup>                                                     |
| 1EDQ     | Chitinase A<br>Allosamizoline                                                                                  | Chitinase A mutant W167A (1X6N)<br>Allosamidin (AO3) <sup>5</sup>                                       | Chitinase A mutant W167A (1X6N)<br>Allosamidin (AO3) <sup>5</sup>                                 | Chitinase 1 (3WL1)<br>N-acetyl-D-glucosamine (NAG) <sup>2</sup>                                                                                             |
| 1EWZ     | Beta-Lactamase OXA-10 (1R)-2-(1-carboxy-2-hydroxy-2-methyl-propyl)-5,5-dimethyl-thiazolidine-4-carboxylic acid | OXA-10 (2WG1)<br>Open form - penicillin g (PNM) <sup>5</sup>                                            | OXA-10 (1FOF)<br>Cobalt (II) ion (Co) <sup>11</sup>                                               | Beta-lactamase OXA-24 8 (3FZC) (2S,3R)-4-(2-aminoethylcarbamoyloxy)-2-[(2-methanoylindolizin-3-yl)amino]-3-methyl-3-sulfinobutanoic acid (MXF) <sup>5</sup> |
| 1GOU     | Ribonuclease<br>Guanosine-3'-monophosphate                                                                     | Ribonuclease bi (1GOY)<br>Guanosine-3'-monophosphate (3GP) <sup>1</sup>                                 | <b>Ribonuclease bi (1GOY)</b><br><b>Sulfate ion (SO4)<sup>12</sup></b>                            | Ribonuclease bi (1GOY)<br>Guanosine 3'-monophosphate (3GP) <sup>1</sup>                                                                                     |
| 1MR7     | Streptogramin A Acetyltransferase<br>Acetyl-coenzyme A                                                         | Vat(D) (1KK4)<br>Acetyl coenzyme A (ACO) <sup>6</sup>                                                   | Vat(D) (1KK4)<br>Acetyl coenzyme A (ACO) <sup>6</sup>                                             | Hexapeptide-repeat containing-acetyltransferase (3NZ2)<br>Acetyl-coenzyme A (ACO) <sup>6</sup>                                                              |
| 1MTZ     | Proline iminopeptidase<br>3-amino-1-chloro-4-phenylbutanol-2-yl                                                | Tricorn interacting factor F1 (1MU0)<br>(2R,3S)-3-amino-1-chloro-4-phenylbutan-2-ol (PHK) <sup>5</sup>  | Tricorn F1-mutant e245q (1XRR)<br>Proline (PRO) <sup>1</sup>                                      | <b>Gamma lactamase (1HL7)</b><br><b>3a,4,7,7a-tetrahydro-benzo [1,3] dioxol-2- one (BD1)<sup>12</sup></b>                                                   |

|      |                                                                                                  |                                                                                                                                                                                                                                                                                                                      |                                                                                                                                                 |                                                                                                                                                                                            |
|------|--------------------------------------------------------------------------------------------------|----------------------------------------------------------------------------------------------------------------------------------------------------------------------------------------------------------------------------------------------------------------------------------------------------------------------|-------------------------------------------------------------------------------------------------------------------------------------------------|--------------------------------------------------------------------------------------------------------------------------------------------------------------------------------------------|
| 1NDB | Carnitine acetyltransferase<br>Coenzyme A                                                        | Carnitine acetyltransferase (2H3P)<br>Acetyl coenzyme A (ACO) <sup>6</sup>                                                                                                                                                                                                                                           | <b>No results</b>                                                                                                                               | Carnitine acetyltransferase isoform<br>2 (1S5O)<br>Carnitine (152) <sup>6</sup>                                                                                                            |
| 1ROM | N-acylamino acid racemase<br>N-2-acetyl-L-glutamine                                              | N-acylamino acid racemase<br>(1XPY)<br>N 2 -acetyl-L-glutamine (NLQ) <sup>6</sup>                                                                                                                                                                                                                                    | Nacylamino acid racemase (2FKR)<br>N 2 -acetyl-L-glutamine (NLQ) <sup>6</sup>                                                                   | <b>Mandelate racemase/muonate<br/>lactonizing enzyme family pro-<br/>tein (3TOY)</b><br><b>Calcium ion (Ca)</b> <sup>12</sup>                                                              |
| 1RZV | Glycogen synthase 1<br>Adenosine-5'-diphosphate                                                  | Glycogen synthase (1RZU)<br>Adenosine-5'-diphosphate (ADP) <sup>7</sup>                                                                                                                                                                                                                                              | Glycogen synthase (1RZU)<br>Adenosine-5'-diphosphate (ADP) <sup>7</sup>                                                                         | Glycogen synthase (3GUH)<br>1,5-anhydrosorbitol (ASO) <sup>1</sup>                                                                                                                         |
| 1SGZ | Beta-secretase<br>Beta-secretase inhibitor                                                       | Beta-secretase 1 (3I25)<br>N-[(2S,3S,5R)-1-(3,5-<br>difluorophenoxy)-3-hydroxy-<br>5-(2-methoxyethoxy)-6-<br>[[[(2S)-3-methyl-1-oxo-1-<br>(phenylmethylamino)butan-2-<br>yl]amino]-6-oxo-hexan-2-yl]-5-<br>(methyl-methylsulfonyl-amino)-n'-<br>[(1R)-1-phenylethyl]benzene-1,3-<br>dicarboxamide (MV7) <sup>5</sup> | Beta secretase (2OHQ)<br>Glycerol (GOL) <sup>12</sup>                                                                                           | Beta-secretase 1 (2FDP)<br>N1-((2S,3S,5R)-3-amino-<br>6-(4-fluorophenylamino)-<br>5-methyl-6-oxo-1-phenylhexan-2-<br>yl)-n3,n3- dipropylisophthalamide<br>(FRP) <sup>5</sup>               |
| 1TIB | Lipase<br>Diundecyl phosphatidyl choline                                                         | Lipase (1GT6)<br>Oleic acid (OLA) <sup>2</sup>                                                                                                                                                                                                                                                                       | Triglyceride lipase (4TGL)<br>Diethyl phosphonate (DEP) <sup>3</sup>                                                                            | Lipase (1GT6)<br>Oleic acid (OLA) <sup>2</sup>                                                                                                                                             |
| 1TVN | Cellulase<br>Cellobiose                                                                          | Endoglucanase cel5a (4A3H)<br>2,4-dinitrophenyl-2-deoxy-<br>2-fluoro-beta-D-cellobioside<br>(DCB) <sup>1</sup>                                                                                                                                                                                                       | <b>Endoglucanase cel5g (1TVP)</b><br><b>4-(2-hydroxyethyl)-1-piperazine</b><br><b>ethanesulfonic acid (EPE)</b> <sup>12</sup>                   | Endoglucanase D (3NDZ)<br>Cellotriose (CT3) <sup>1</sup>                                                                                                                                   |
| 1V0S | Phospholipase D<br>2-(butyryloxy)-1-<br>[(tetrahydroxyphosphoranyl)oxy]<br>methyl ethyl butyrate | Phospholipase D (2ZE9)<br>(2r)-3-(phosphonoxy)propane-<br>1,2-diyl diheptanoate<br>(PD7) <sup>2</sup>                                                                                                                                                                                                                | Phospholipase D (1U52)<br>1,2-didecanoyl- <i>sn</i> -glycero-<br>3-phosphoethanolamine<br>(PEX) <sup>6</sup>                                    | Phospholipase D (1V0R)<br>Tungstate (VI) ion (WO5) <sup>5</sup>                                                                                                                            |
| 1Y2Q | Threonyl-tRNA synthetase<br>Serine-3'-aminoadenosine                                             | Threonyl-tRNA synthetase (3PD2)<br>Serine-3'-aminoadenosine (A3S) <sup>1</sup>                                                                                                                                                                                                                                       | Threonyl-tRNA synthetase (2HL0)<br>Serine-3'-aminoadenosine (A3S) <sup>1</sup>                                                                  | Threonyl-tRNA synthetase (4RR6)<br>Serine-3'-aminoadenosine (A3S) <sup>1</sup>                                                                                                             |
| 1ZUH | Shikimate kinase<br>Shikimate-3-phosphate                                                        | Shikimate kinase (3MUF)<br>Adenosine-5'-diphosphate (ADP) <sup>2</sup>                                                                                                                                                                                                                                               | Shikimate kinase (1ZUI)<br>Trihydroxycyclohex-1-<br>ene-1-carboxylic acid<br>(SKM) <sup>6</sup>                                                 | <b>APS kinase domain of the PAPS</b><br><b>synthetase 1 (2OFW)</b><br><b>Adenosine-5'-phosphosulfate</b><br><b>(ADX)</b> <sup>6</sup>                                                      |
| 2CHS | Chorismate mutase<br>Prephenic acid                                                              | Chorismate mutase (1COM)<br>Prephenic acid (PRE) <sup>2</sup>                                                                                                                                                                                                                                                        | Chorismate mutase (1COM)<br>Prephenic acid (PRE) <sup>2</sup>                                                                                   | Chorismate mutase (1COM)<br>Prephenic acid (PRE) <sup>2</sup>                                                                                                                              |
| 2DPS | Leucyl/phenylalanyl-tRNA-protein<br>transferase<br>Puromycin                                     | Leucyl/phenylalanyl-tRNA-protein<br>transferase (2DPT)<br>Puromycin (PUY) <sup>1</sup>                                                                                                                                                                                                                               | Leucyl/phenylalanyl-tRNA-protein<br>transferase (2DPT)<br>Puromycin (PUY) <sup>1</sup>                                                          | Leucyl/phenylalanyl-tRNA-protein<br>transferase (2Z3O)<br>Phenylalanine (PHE) <sup>6</sup>                                                                                                 |
| 2GT2 | GDP-mannose mannosyl hydrolase<br>Guanosine-5'-diphosphate                                       | GDP-mannose mannosyl hydrolase<br>(2GT4)<br>Guanosine-5'-diphosphate-alpha-<br>d-mannose (GDD) <sup>6</sup>                                                                                                                                                                                                          | GDP-mannose mannosyl hydrolase<br>(2I8T)<br>Guanosine-5'-diphosphate-alpha-<br>d-mannose (GDD) <sup>6</sup>                                     | GDP-mannose mannosyl hydrolase<br>(2GT4)<br>Guanosine-5'-diphosphate-alpha-<br>d-mannose (GDD) <sup>6</sup>                                                                                |
| 2O9P | Beta-glucosidase B<br>Cellotetraose                                                              | Beta-glucosidase B (2Z1S)<br>Beta-D-glucopyranosyl-(1-<br>>4)-beta-D-glucopyranosyl-(1-<br>>4)-beta-D-glucopyranosyl-<br>(1->4)-beta-D-glucopyranose<br>(CTT) <sup>6</sup>                                                                                                                                           | Beta-glucosidase B (2JIE)<br>2-deoxy-2-fluoro-alpha-D-<br>glucopyranose (G2F) <sup>7</sup>                                                      | Beta-glucosidase A (1OIM)<br>Moranoline (NOJ) <sup>5</sup>                                                                                                                                 |
| 2SIL | Sialidase<br>2-deoxy-2,3-dehydro-N-acetyl-<br>neuraminic acid                                    | Neuraminidase (2SIM)<br>2-deoxy-2,3-dehydro-N-<br>acetyl-neuraminic acid<br>(DAN) <sup>5</sup>                                                                                                                                                                                                                       | Neuraminidase (1SIL)<br>2-deoxy-2,3-dehydro-N-<br>acetyl-neuraminic acid<br>(DAN) <sup>5</sup>                                                  | Trans-sialidase (2AH2)<br>3-fluorosialic acid (FSI) <sup>5</sup>                                                                                                                           |
| 2V78 | Fruktokinase<br>Adenosine monophosphate                                                          | 2-keto-3-deoxygluconate kinase<br>(2VAR)<br>Phosphoaminophosphonic<br>acid-adenylate ester (ANP) <sup>6</sup>                                                                                                                                                                                                        | 2-keto-3-deoxygluconate kinase<br>(2DCN)<br>Trihydroxy-5-<br>[(phosphonatoxy)methyl]<br>tetrahydrofuran-2-carboxylic<br>acid (CKP) <sup>7</sup> | Ketohexokinase (3QAI)<br>N 8 -(cyclopropylmethyl)-2-<br>(2,6-diazaspiro[3.3]hept-2-yl)-<br>n 4 -[2-(methylsulfanyl)phenyl]<br>pyrimido[5,4-d]pyrimidine-4,8-<br>diamine (XNN) <sup>5</sup> |
| 2VQ4 | Glucoamylase A<br>Glucose                                                                        | <b>Acyl carrier protein (3EJB)</b><br><b>Heptyl 1-thiohexopyranoside</b><br><b>(HTG)</b> <sup>8</sup>                                                                                                                                                                                                                | <b>No results</b>                                                                                                                               | Glucoamylase A (2V8L)<br>Alpha-D-glucose (GLC) <sup>11</sup>                                                                                                                               |

|      |                                                                                                                                                                                        |                                                                                                                                                                                                                               |                                                                                                                     |                                                                                                                                                                                    |
|------|----------------------------------------------------------------------------------------------------------------------------------------------------------------------------------------|-------------------------------------------------------------------------------------------------------------------------------------------------------------------------------------------------------------------------------|---------------------------------------------------------------------------------------------------------------------|------------------------------------------------------------------------------------------------------------------------------------------------------------------------------------|
| 2WZT | Aldo-ketoreductase<br>(2R,3R,4R,5R)-5-(6-amino-9H-purin-9-yl)-3-hydroxy-4-(phosphonoxy)-tetrahydrofuran-2-yl]-methyl [(2R,3S,4S)-3,4-dihydroxytetrahydrofuran-2-yl]-methyl diphosphate | Aldo-keto reductase (2WZM)<br>[(2R,3R,4R,5R)-5-(6-amino-9H-purin-9-yl)-3-hydroxy-4-(phosphonoxy)-tetrahydrofuran-2-yl]-methyl [(2R,3S,4S)-3,4-dihydroxytetrahydrofuran-2-yl]-methyl dihydrogen diphosphate (NA7) <sup>9</sup> | Aldose reductase (1AZ2)<br>NADP nicotinamide-adenine-dinucleotide phosphate (NAP) <sup>4</sup>                      | Yvgn protein (3D3F)<br>NADPH (NDP) <sup>4</sup>                                                                                                                                    |
| 3BLM | Beta-lactamase<br>N-(1-carboxy-2-hydroxy-4-oxo-butyl)-N-(3-oxo-cispropenyl)-amine                                                                                                      | Beta-lactamase (1GHP)<br>Open form - penicillin g (PNM) <sup>10</sup>                                                                                                                                                         | Beta-lactamase (1BLC)<br>N-(2-hydroxy-4-oxo-butyl)-N-(3-oxo-transpropenyl)amine (TEM)                               | Beta-lactamase (4XUZ)<br>(3R,6S)-2-hydroxy-3-[(thiophen-2-ylacetyl)amino]-1,2-oxaborinan-6-ylacetic acid (4D6) <sup>5</sup>                                                        |
| 3D0O | L-lactate dehydrogenase 1<br>Nicotinamide-adenine-dinucleotide                                                                                                                         | Lactate dehydrogenase (3D4P)<br>Nicotinamide-adenine-dinucleotide (NAD) <sup>4</sup>                                                                                                                                          | Lactate dehydrogenase (1LDN)<br>Oxamic acid (OXM) <sup>5</sup>                                                      | Malate dehydrogenase (1UXJ)<br>Nicotinamide-adenine-dinucleotide (NAD) <sup>4</sup>                                                                                                |
| 3GSZ | RNA-directed RNA polymerase<br>2-(3-bromophenyl)-6-[(2-hydroxymethyl)-amino]-1H-benzo[de]isoquinoline-1,3(2H)-dione                                                                    | RNA polymerase (3BR9)<br>(2r)-2-(3-[5-hydroxy-2-(3-methylbutyl)-3-oxo-6-thiophen-2-yl-2,3-dihydropyridazin-4-yl]-1,1-dioxido-2h-1,2,4-benzothiadiazin-7-yloxy)propanamide (DEY) <sup>5</sup>                                  | RNA polymerase (1YVX)<br>3-[isopropyl(4-methylbenzoyl)amino]-5-phenylthiophene-2-carboxylic acid (IPC) <sup>5</sup> | RNA-directed RNA polymerase (3CSO)<br>(11S)-10-acetyl-11-[4-(benzyloxy)-3-chlorophenyl]-3,3-dimethyl-2,3,4,5,10,11-hexahydro-1h-dibenzo[b,e][1,4]diazepin-1-one (XNI) <sup>5</sup> |
| 3I0C | ABO glycosyltransferase<br>D-galactose                                                                                                                                                 | Fucosylgalactoside alpha N-acetylgalactosaminyltransferase (3V0N)<br>5-(5-formylthiophen-2-yl)uridine-5'(2-(acetylamino)-2-deoxy-alpha-D-galactosyl)-diphosphate (3GW) <sup>5</sup>                                           | Galactosyltransferase (1ZIZ)<br>Beta-D-galactose (GAL) <sup>6</sup>                                                 | Histo-blood group abo system transferase (5C1H)<br>Octyl 3-deoxy-2-O-(6-deoxy-alpha-L-galactopyranosyl)-beta-D-xylo-hexopyranoside (DA8) <sup>5</sup>                              |

Table 3: COACH's ligand/binding site recognition performance on the LigaSite non-redundant dataset containing 373 apo-proteins for which a corresponding holo structure is available (Desailly *et al.*, 2008). APO and HOLO Protein ID are the PDB codes of the corresponding three-dimensional structures. Ligand ID is the ligand name abbreviation used in the Protein Data Bank. Ligand type indicates the nature of the ligand: organic (O) or ion (I).

| APO Protein ID | HOLO Protein ID | Ligand ID | Rank            | Ligand details        | Ligand type |
|----------------|-----------------|-----------|-----------------|-----------------------|-------------|
| 180L           | 3GUM            | PXY       | 1 <sup>st</sup> | Substrate analog      | O           |
| 1A4U           | 2BD0            | NAP       | 1 <sup>st</sup> | Cofactor analog       | O           |
| 1ADE           | 1GIN            | GDP       | 1 <sup>st</sup> | Cofactor              | O           |
| 1AK1           | 2HRE            | PP9       | 1 <sup>st</sup> | Substrate             | O           |
| 1AKZ           | 3EUG            | GOL       | 1 <sup>st</sup> | Natural ligand        | O           |
| 1ARB           | 3E0N            | ARM       | 1 <sup>st</sup> | Specific inhibitor    | O           |
| 1ARL           | 3WC7            | EF1       | 1 <sup>st</sup> | Specific inhibitor    | O           |
| 1B8E           | 1GX9            | REA       | 1 <sup>st</sup> | Specific ligand       | O           |
| 1B8P           | 4PLT            | NAI       | 1 <sup>st</sup> | Cofactor              | O           |
| 1BD9           | 1B7A            | OPE       | 1 <sup>st</sup> | Natural ligand analog | O           |
| 1BK7           | 1IYB            | 5GP       | 1 <sup>st</sup> | Reaction product      | O           |
| 1BKZ           | 4BLJ            | 70B       | 1 <sup>st</sup> | Natural ligand analog | O           |
| 1BQC           | 5D9M            | GLC       | 1 <sup>st</sup> | Substrate             | O           |
| 1BYI           | 4WOP            | CTP       | 1 <sup>st</sup> | substrate             | O           |
| 1C48           | 1CQF            | GLA       | 1 <sup>st</sup> | Natural ligand        | O           |
| 1C5H           | 1H4G            | FXP       | 1 <sup>st</sup> | Specific inhibitor    | O           |
| 1CEO           | 1CEN            | BGC       | 1 <sup>st</sup> | Substrate analog      | O           |
| 1CEX           | 1XZM            | DPE       | 1 <sup>st</sup> | Covalent inhibitor    | O           |
| 1CPJ           | 2XU1            | 424       | 1 <sup>st</sup> | Specific inhibitor    | O           |
| 1CRW           | 4WNC            | NAD       | 1 <sup>st</sup> | Cofactor              | O           |
| 1CWY           | 1ESW            | ACR       | 1 <sup>st</sup> | Specific inhibitor    | O           |
| 1DCO           | 1DCP            | HBI       | 1 <sup>st</sup> | Cofactor analog       | O           |
| 1DHN           | 2NM2            | NEU       | 1 <sup>st</sup> | Substrate analog      | O           |
| 1DQ0           | 3U4X            | XMM       | 1 <sup>st</sup> | Natural ligand analog | O           |
| 1DUP           | 1SEH            | UMP       | 1 <sup>st</sup> | Reaction product      | O           |
| 1E4F           | 4PL7            | ATP       | 1 <sup>st</sup> | Substrate             | O           |
| 1E5L           | 3ABI            | NAD       | 1 <sup>st</sup> | Cofactor              | O           |
| 1E8Y           | 3QK0            | QK0       | 1 <sup>st</sup> | Specific inhibitor    | O           |
| 1EDQ           | 3WL1            | NAG       | 1 <sup>st</sup> | Reaction product      | O           |
| 1EPA           | 1EPB            | REA       | 1 <sup>st</sup> | Natural ligand        | O           |
| 1EWZ           | 3FZC            | MXF       | 1 <sup>st</sup> | Inhibitor             | O           |
| 1EY0           | 1A2T            | THP       | 1 <sup>st</sup> | Specific inhibitor    | O           |
| 1EZI           | 3K8D            | CTP       | 1 <sup>st</sup> | Substrate             | O           |
| 1F14           | 4DYD            | NAD       | 1 <sup>st</sup> | Cofactor              | O           |
| 1F1S           | 1OJM            | GCD       | 1 <sup>st</sup> | Reaction product      | O           |
| 1F2V           | 1I1H            | COJ       | 1 <sup>st</sup> | Reaction product      | O           |
| 1F41           | 4IK7            | IMN       | 1 <sup>st</sup> | Specific ligand       | O           |
| 1F5Z           | 4OE7            | GXP       | 1 <sup>st</sup> | Product analog        | O           |
| 1FCQ           | 1FCV            | NAG       | 1 <sup>st</sup> | Substrate fragment    | O           |
| 1FGB           | 1EEI            | GAA       | 1 <sup>st</sup> | Specific inhibitor    | O           |
| 1FO9           | 2AM3            | UPG       | 1 <sup>st</sup> | Substrate analog      | O           |
| 1FSF           | 1HOR            | AGP       | 1 <sup>st</sup> | Specific inhibitor    | O           |
| 1FTF           | 2WDS            | COA       | 1 <sup>st</sup> | Substrate             | O           |
| 1FTR           | 2FHJ            | MFN       | 1 <sup>st</sup> | Cofactor              | O           |
| 1FWL           | 1H73            | ANP       | 1 <sup>st</sup> | Substrate analog      | O           |



|      |      |         |                 |                              |   |
|------|------|---------|-----------------|------------------------------|---|
| 1G40 | 1Y8E | SVR     | 1 <sup>st</sup> | Specific inhibitor           | O |
| 1G4E | 1G4T | FTP     | 1 <sup>st</sup> | Reaction product             | O |
| 1G95 | 1HM9 | UD1     | 1 <sup>st</sup> | Reaction product             | O |
| 1GBS | 4CFP | AMV     | 1 <sup>st</sup> | Substrate analog             | O |
| 1GCE | 3O88 | BSH     | 1 <sup>st</sup> | Specific inhibitor           | O |
| 1GFS | 3ICP | NAD     | 1 <sup>st</sup> | Cofactor                     | O |
| 1GOU | 1GOY | 3GP     | 1 <sup>st</sup> | Substrate analog             | O |
| 1GSH | 1GSA | ADP     | 1 <sup>st</sup> | Reaction product             | O |
| 1GWK | 1GWL | BMA     | 1 <sup>st</sup> | Natural ligand               | O |
| 1GY0 | 1OG1 | TAD     | 1 <sup>st</sup> | Substrate analog             | O |
| 1HK9 | 4Y91 | NUC     | 1 <sup>st</sup> | Natural ligand               | O |
| 1HKA | 1RAO | HH2     | 1 <sup>st</sup> | Product analog               | O |
| 1HM5 | 3Q7I | 6GP     | 1 <sup>st</sup> | Reaction product             | O |
| 1HNK | 1HND | COA     | 1 <sup>st</sup> | Reaction product             | O |
| 1HO1 | 1M5W | DXP     | 3 <sup>rd</sup> | Substrate                    | O |
| 1I7N | 1I7L | ATP     | 1 <sup>st</sup> | Endogenous ligand            | O |
| 1IAD | 1QJJ | Peptide | 1 <sup>st</sup> | Inhibitor                    | O |
| 1ILV | 2V4O | PO4     | 1 <sup>st</sup> | Reaction product             | I |
| 1INL | 2O0L | S4M     | 1 <sup>st</sup> | Substrate analog             | O |
| 1J85 | 4PZK | SAH     | 1 <sup>st</sup> | Cofactor                     | O |
| 1J8S | 1J8R | GAL     | 1 <sup>st</sup> | Natural ligand               | O |
| 1JCF | 4PKG | ATP     | 1 <sup>st</sup> | Substrate                    | O |
| 1JKS | 3NAY | MP6     | 1 <sup>st</sup> | Inhibitor                    | O |
| 1JXO | 3WP0 | Peptide | 1 <sup>st</sup> | Specific ligand              | O |
| 1JYK | 4ZDQ | CTP     | 2 <sup>nd</sup> | Substrate                    | O |
| 1K0M | 1EV9 | GST     | 1 <sup>st</sup> | Substrate analog             | O |
| 1K3O | 3VPQ | GSH     | 1 <sup>st</sup> | Substrate                    | O |
| 1K6A | 5D4Y | XYP     | 1 <sup>st</sup> | Substrate                    | O |
| 1KAM | 1K4M | NAD     | 1 <sup>st</sup> | Substrate                    | O |
| 1KF5 | 1JVU | C2P     | 1 <sup>st</sup> | Reaction product             | O |
| 1KHD | 3R88 | PRP     | 1 <sup>st</sup> | Substrate                    | O |
| 1KN9 | 1B12 | 1PN     | 1 <sup>st</sup> | Specific inhibitor           | O |
| 1KPA | 1RZY | 5AS     | 1 <sup>st</sup> | Substrate analog             | O |
| 1KWB | 1EIR | BPY     | 1 <sup>st</sup> | Substrate                    | O |
| 1L7D | 1L7E | NAI     | 1 <sup>st</sup> | Reaction product             | O |
| 1LBV | 1NV6 | PI      | 1 <sup>st</sup> | Reaction product             | I |
| 1LCI | 2D1S | SLU     | 1 <sup>st</sup> | Reaction intermediate analog | O |
| 1LF4 | 3APR | Peptide | 1 <sup>st</sup> | Inhibitor                    | O |
| 1LTU | 1KW0 | BH4     | 1 <sup>st</sup> | Cofactor                     | O |
| 1M1Z | 1JGT | APC     | 1 <sup>st</sup> | Substrate analog             | O |
| 1MKB | 4KEH | 1R3     | 1 <sup>st</sup> | Substrate analog             | O |
| 1MMI | 1D1E | Peptide | 1 <sup>st</sup> | Specific inhibitor           | O |
| 1MR7 | 3NZ2 | ACO     | 1 <sup>st</sup> | Substrate                    | O |
| 1MTZ | 1XQX | PCS     | 2 <sup>nd</sup> | Specific inhibitor           | O |
| 1MWK | 3KVG | ANP     | 1 <sup>st</sup> | Substrate analog             | O |
| 1MZL | 1UVC | STE     | 1 <sup>st</sup> | Natural ligand               | O |
| 1N05 | 1N07 | FMN     | 1 <sup>st</sup> | Reaction product             | O |
| 1NDB | 1S5O | 152     | 1 <sup>st</sup> | Substrate                    | O |
| 1NON | 4P83 | U5P     | 1 <sup>st</sup> | Specific ligand              | O |
| 1NXM | 2IXC | TRH     | 1 <sup>st</sup> | Substrate analog             | O |
| 1O24 | 3HZG | FAD     | 1 <sup>st</sup> | Cofactor                     | O |
| 1OEM | 2CNH | IZB     | 1 <sup>st</sup> | Specific inhibitor           | O |

|       |      |         |                  |                         |   |
|-------|------|---------|------------------|-------------------------|---|
| 1OFP  | 4UMB | 0V5     | 1 <sup>st</sup>  | Specific inhibitor      | O |
| 1OGH  | 3TPS | DUP     | 1 <sup>st</sup>  | Substrate analog        | O |
| 1OGL  | 1CJE | DUN     | 1 <sup>st</sup>  | Substrate analog        | O |
| 1OGM  | 1OGO | GLC     | 1 <sup>st</sup>  | Reaction product        | O |
| 1OJQ  | 1GZF | NAD     | 1 <sup>st</sup>  | Cofactor                | O |
| 1OLZ  | 4GZ8 | CA      | 1 <sup>st</sup>  | Specific ligand         | I |
| 1OOI  | 2GTE | VA      | 1 <sup>st</sup>  | Natural ligand          | O |
| 1OPY  | 2INX | FFP     | 2 <sup>nd</sup>  | Transition state analog | O |
| 1OXT  | 1OXU | ADP     | 1 <sup>st</sup>  | Reaction product        | O |
| 1P1X  | 1UB3 | HPD     | 1 <sup>st</sup>  | Reaction product        | O |
| 1P5H  | 2GCE | SFC     | 1 <sup>st</sup>  | Substrate analog        | O |
| 1P74  | 3PGJ | SKM     | 1 <sup>st</sup>  | Substrate               | O |
| 1PDB  | 3CL9 | MTX     | 1 <sup>st</sup>  | Inhibitor               | O |
| 1PNG  | 1PNF | NDG     | 1 <sup>st</sup>  | Substrate analog        | O |
| 1Q52  | 4I42 | IHA     | 1 <sup>st</sup>  | Product analog          | O |
| 1Q7M  | 2YCK | THG     | 1 <sup>st</sup>  | Substrate               | O |
| 1QCZ  | 2ATE | NIA     | 1 <sup>st</sup>  | Substrate analog        | O |
| 1QID  | 5EHN | 5NZ     | 1 <sup>st</sup>  | Specific inhibitor      | O |
| 1QTO  | 5CJB | 52G     | 1 <sup>st</sup>  | Specific ligand         | O |
| 1QTR  | 1XRR | Pro     | 10 <sup>th</sup> | Substrate               | O |
| 1R0M  | 1SJC | SMG     | 2 <sup>nd</sup>  | Substrate               | O |
| 1R12  | 4F46 | DVN     | 1 <sup>st</sup>  | Substrate analog        | O |
| 1R29  | 1R2B | Peptide | 1 <sup>st</sup>  | Natural ligand          | O |
| 1R15  | 1R14 | SAM     | 1 <sup>st</sup>  | Substrate               | O |
| 1RIQ  | 2ZZG | A5A     | 1 <sup>st</sup>  | Substrate analog        | O |
| 1RJ1  | 3OIB | IOD     | 2 <sup>nd</sup>  | Non-specific ligand     | I |
| 1RK M | 1B0H | Peptide | 1 <sup>st</sup>  | Specific ligand         | O |
| 1RZV  | 3GUH | ASO     | 1 <sup>st</sup>  | Substrate analog        | O |
| 1S2L  | 1S2G | 3D1     | 1 <sup>st</sup>  | Substrate               | O |
| 1S7K  | 4LXY | ACO     | 1 <sup>st</sup>  | Substrate               | O |
| 1SGK  | 1DDT | APU     | 1 <sup>st</sup>  | Substrate analog        | O |
| 1SGZ  | 2FDP | FRP     | 1 <sup>st</sup>  | Inhibitor               | O |
| 1SJY  | 2A8P | MN      | 1 <sup>st</sup>  | Cofactor                | I |
| 1SNT  | 1F25 | DAN     | 1 <sup>st</sup>  | Specific inhibitor      | O |
| 1SQG  | 3M6V | SAM     | 1 <sup>st</sup>  | COFACTOR                | O |
| 1SUL  | 1Z22 | GDP     | 1 <sup>st</sup>  | Specific ligand         | O |
| 1SWH  | 4CPH | LH4     | 1 <sup>st</sup>  | Specific ligand analog  | O |
| 1TGN  | 4Z6A | 0Z6     | 1 <sup>st</sup>  | Specific inhibitor      | O |
| 1THV  | 4TVT | ASC     | 3 <sup>rd</sup>  | Natural ligand          | I |
| 1TIB  | 1GT6 | OLA     | 1 <sup>st</sup>  | Reaction product        | O |
| 1TJE  | 1TKE | SER     | 1 <sup>st</sup>  | Substrate analog        | O |
| 1TJV  | 2E9F | ARG     | 1 <sup>st</sup>  | Reaction product        | O |
| 1TVN  | 3NDZ | CT3     | 1 <sup>st</sup>  | Substrate analog        | O |
| 1TW0  | 1TXC | 2AN     | 1 <sup>st</sup>  | Non-specific ligand     | O |
| 1TYF  | 4U0G | ZIL     | 1 <sup>st</sup>  | Substrate analog        | O |
| 1TYV  | 1TYU | TYV     | 2 <sup>nd</sup>  | Natural ligand          | O |
| 1TZV  | 3R2C | NUC     | 1 <sup>st</sup>  | Natural ligand          | O |
| 1U0T  | 1Z0U | NAP     | 1 <sup>st</sup>  | Reaction product        | O |
| 1U7U  | 1U7W | CTP     | 1 <sup>st</sup>  | Substrate               | O |
| 1UAJ  | 4YVK | SFG     | 1 <sup>st</sup>  | Substrate analog        | O |
| 1UBI  | 2D3G | Peptide | 1 <sup>st</sup>  | Specific ligand         | O |

|      |      |         |                 |                               |   |
|------|------|---------|-----------------|-------------------------------|---|
| 1UF4 | 1UF5 | CDT     | 1 <sup>st</sup> | Substrate                     | O |
| 1ULU | 1VL8 | NAP     | 1 <sup>st</sup> | Cofactor                      | O |
| 1UMF | 1QXO | FMN     | 1 <sup>st</sup> | Cofactor                      | O |
| 1UXZ | 1UYX | BGC     | 1 <sup>st</sup> | Specific ligand               | O |
| 1UYL | 4YKQ | 4EO     | 1 <sup>st</sup> | Inhibitor                     | O |
| 1V0S | 1V0R | WO5     | 1 <sup>st</sup> | Inhibitor                     | I |
| 1V6Z | 2CX8 | SAH     | 1 <sup>st</sup> | Cofactor                      | O |
| 1V77 |      |         |                 | <b>No significant results</b> |   |
| 1VFJ | 2XUL | ATP     | 1 <sup>st</sup> | Specific ligand               | O |
| 1VIC | 2XWL | CTP     | 1 <sup>st</sup> | Substrate                     | O |
| 1VJU | 3DWR | OPA     | 1 <sup>st</sup> | Substrate analog              | O |
| 1VPN | 3BWR | SIA     | 1 <sup>st</sup> | Specific ligand               | O |
| 1W9A | 2AQ6 | PLP     | 1 <sup>st</sup> | Reaction product              | O |
| 1WJG | 3HGM | ATP     | 1 <sup>st</sup> | Specific ligand               | O |
| 1WNY | 1WK8 | VMS     | 1 <sup>st</sup> | Substrate analog              | O |
| 1WOS | 1WOO | THG     | 1 <sup>st</sup> | Substrate                     | O |
| 1WS9 | 2JIF | FAD     | 1 <sup>st</sup> | Cofactor                      | O |
| 1WTJ | 1V9N | NDP     | 1 <sup>st</sup> | Cofactor                      | O |
| 1WXF | 2PZ8 | APC     | 1 <sup>st</sup> | Substrate analog              | O |
| 1X56 | 3A5Y | KAA     | 1 <sup>st</sup> | Substrate analog              | O |
| 1X7O | 1X7P | SAM     | 1 <sup>st</sup> | Cofactor                      | O |
| 1X8F | 3UND | PEP     | 1 <sup>st</sup> | Substrate                     | O |
| 1XIX | 1P4N | Peptide | 1 <sup>st</sup> | Substrate                     | O |
| 1XK7 | 1T3Z | CAO     | 1 <sup>st</sup> | Substrate analog              | O |
| 1XO6 | 3TV5 | RCP     | 1 <sup>st</sup> | Inhibitor                     | O |
| 1XQO | 1XQP | 8HG     | 1 <sup>st</sup> | Substrate analog              | O |
| 1XW2 | 1WU5 | XYP     | 2 <sup>nd</sup> | Reaction product              | O |
| 1Y2Q | 4RR6 | A3S     | 1 <sup>st</sup> | Substrate analog              | O |
| 1Y2T | 4Z2S | NDG     | 1 <sup>st</sup> | Endogenous ligand analog      | O |
| 1YBT | 4WP8 | ZDA     | 1 <sup>st</sup> | inhibitor                     | O |
| 1YVY | 2GMV | PEP     | 1 <sup>st</sup> | Reaction product              | O |
| 1Z7G | 1HMP | 5GP     | 1 <sup>st</sup> | Reaction product              | O |
| 1ZAH | 3TU9 | 5MM     | 1 <sup>st</sup> | Specific inhibitor            | O |
| 1ZCU | 3T7O | UPG     | 1 <sup>st</sup> | Substrate                     | O |
| 1ZNW | 1ZNX | 5GP     | 1 <sup>st</sup> | Substrate                     | O |
| 1ZTY | 1ZU0 | CBS     | 7 <sup>th</sup> | Natural ligand                | O |
| 1ZUH | 2IYR | SKM     | 2 <sup>nd</sup> | Substrate                     | O |
| 2A6Z | 1N47 | TNR     | 1 <sup>st</sup> | Specific ligand               | O |
| 2A8F | 2AIB | ERG     | 1 <sup>st</sup> | Specific ligand               | O |
| 2AD1 | 1LS6 | A3P     | 1 <sup>st</sup> | Reaction product              | O |
| 2AHF | 2AHG | UCD     | 1 <sup>st</sup> | Substrate                     | O |
| 2AHU | 2AHV | COA     | 1 <sup>st</sup> | Cofactor                      | O |
| 2AMJ | 4FGJ | FAD     | 1 <sup>st</sup> | Cofactor                      | O |
| 2B0J | 3F46 | I2C     | 1 <sup>st</sup> | Cofactor                      | O |
| 2B6P | 2EVU | GOL     | 1 <sup>st</sup> | Non-specific ligand           | O |
| 2B78 | 3VSE | SAH     | 1 <sup>st</sup> | Cofactor                      | O |
| 2B98 | 2C9D | PHR     | 1 <sup>st</sup> | Inhibitor                     | O |
| 2BGT | 1IXY | UDP     | 1 <sup>st</sup> | Reaction product              | O |
| 2BJW | 4LZZ | 08T     | 1 <sup>st</sup> | Substrate analog              | O |
| 2BOE | 2BOG | SGC     | 1 <sup>st</sup> | inhibitor                     | O |
| 2C61 | 3OAA | ANP     | 1 <sup>st</sup> | Reaction product analog       | O |
| 2C7I | 3A7R | LAQ     | 1 <sup>st</sup> | Reaction intermediate         | O |

|      |      |     |                  |                                   |   |
|------|------|-----|------------------|-----------------------------------|---|
| 2CAR | 3S86 | IMP | 1 <sup>st</sup>  | Reaction product                  | O |
| 2CHS | 1COM | PRE | 1 <sup>st</sup>  | Reaction product                  | O |
| 2CI3 | 1LXY | CYR | 1 <sup>st</sup>  | Reaction product                  | O |
| 2CWK | 1F3F | D4T | 1 <sup>st</sup>  | Substrate analog                  | O |
| 2CX5 | 2Z0X | 5CA | 1 <sup>st</sup>  | Substrate analog                  | O |
| 2D59 | 4XYL | COA | 1 <sup>st</sup>  | Substrate                         | O |
| 2DHQ | 2BT4 | CA2 | 1 <sup>st</sup>  | Specific inhibitor                | O |
| 2DJ6 | 3QNA | BIO | 1 <sup>st</sup>  | Substrate                         | O |
| 2DKA | 2DKD | PO4 | 1 <sup>st</sup>  | Substrate                         | I |
| 2DPS | 2Z3O | PHE | 1 <sup>st</sup>  | Substrate                         | O |
| 2DQW | 3TZF | HH2 | 1 <sup>st</sup>  | Substrate analog                  | O |
| 2E0C | 4AJ3 | NAP | 1 <sup>st</sup>  | Substrate                         | O |
| 2E0K | 2E0N | SAH | 1 <sup>st</sup>  | Cofactor                          | O |
| 2E10 | 2DTI | BT5 | 1 <sup>st</sup>  | Reaction intermediate             | O |
| 2E1V | 2E1T | MLC | 1 <sup>st</sup>  | Substrate                         | O |
| 2E3S | 2E3O | 16C | 1 <sup>st</sup>  | Substrate                         | O |
| 2ECR | 2R6V | FMN | 1 <sup>st</sup>  | Substrate                         | O |
| 2EX0 | 2ZWI | C5P | 1 <sup>st</sup>  | Substrate analog                  | O |
| 2F82 | 5HWQ | CAA | 1 <sup>st</sup>  | Substrate                         | O |
| 2F9T | 5B8H | PAU | 1 <sup>st</sup>  | Substrate                         | O |
| 2FK7 | 1KPG | SAH | 1 <sup>st</sup>  | Cofactor                          | O |
| 2FP8 | 2V91 | S55 | 2 <sup>nd</sup>  | Substrate                         | O |
| 2FSF | 2FSH | ANP | 1 <sup>st</sup>  | Substrate analog                  | O |
| 2G67 | 2QTC | TDK | 1 <sup>st</sup>  | Reaction intermediate analog      | O |
| 2G95 | 2H3D | NMN | 1 <sup>st</sup>  | Reaction product                  | O |
| 2GFV | 2BYZ | DAO | 1 <sup>st</sup>  | Substrate analog                  | O |
| 2GG4 | 2GGA | S3P | 1 <sup>st</sup>  | Substrate                         | O |
| 2GQV | 2P4T | NAP | 1 <sup>st</sup>  | Cofactor                          | O |
| 2GSF | 4HYH | 1AM | 1 <sup>st</sup>  | Specific inhibitor                | O |
| 2GT2 | 2GT4 | GDD | 1 <sup>st</sup>  | Substrate                         | O |
| 2GUB | 1S5N | XYL | 1 <sup>st</sup>  | Inhibitor                         | O |
| 2GWX | 3V18 | 13M | 4 <sup>th</sup>  | Natural ligand analog             | O |
| 2GYY | 1DSS | NAD | 1 <sup>st</sup>  | Cofactor                          | O |
| 2H2Z | 2A5I | AZP | 1 <sup>st</sup>  | Inhibitor                         | O |
| 2HBJ | 1ZBH | MG  | 1 <sup>st</sup>  | Cofactor                          | I |
| 2HIV | 2HIX | ATP | 1 <sup>st</sup>  | Substrate                         | O |
| 2HK0 | 2HK1 | FUD | 1 <sup>st</sup>  | Substrate                         | O |
| 2HVM | 1FFR | NAG | 1 <sup>st</sup>  | Substrate                         | O |
| 2HY7 | 2Q6V | UDP | 1 <sup>st</sup>  | Substrate analog/reaction product | O |
| 2HZR | 2HZQ | STR | 1 <sup>st</sup>  | Natural ligand                    | O |
| 2I4L | 2J3L | P5A | 1 <sup>st</sup>  | Reaction intermediate analog      | O |
| 2IOB | 2IO9 | GSH | 1 <sup>st</sup>  | Substrate                         | O |
| 2IRU | 3PKY | UTP | 1 <sup>st</sup>  | Substrate                         | O |
| 2J71 | 2J72 | GLC | 1 <sup>st</sup>  | Natural ligand                    | O |
| 2J8N | 2CY2 | ACO | 1 <sup>st</sup>  | Cofactor                          | O |
| 2JBR | 3PFD | FDA | 1 <sup>st</sup>  | Cofactor                          | O |
| 2NWD | 1BB5 | CTO | 1 <sup>st</sup>  | Inhibitor                         | O |
| 2NXC | 3CJT | SAM | 1 <sup>st</sup>  | Cofactor                          | O |
| 2O9P | 1OIM | NOJ | 1 <sup>st</sup>  | Inhibitor                         | O |
| 2OAM | 3E1T | FAD | 1 <sup>st</sup>  | Cofactor                          | O |
| 2OPT | 3B6A | ZCT | 1 <sup>st</sup>  | Specific inhibitor                | O |
| 2OU1 | 1L6L | BOG | 10 <sup>th</sup> | Natural ligand analog             | O |

|      |      |         |                 |                         |   |
|------|------|---------|-----------------|-------------------------|---|
| 2OVE | 2OVD | DAO     | 1 <sup>st</sup> | Specific ligand         | O |
| 2PAW | 4ZZZ | FSU     | 1 <sup>st</sup> | Specific inhibitor      | O |
| 2PFK | 2F48 | FBP     | 1 <sup>st</sup> | Reaction product        | O |
| 2PKF | 4O1G | AGS     | 1 <sup>st</sup> | Substrate analog        | O |
| 2PPN | 1BL4 | AP1     | 1 <sup>st</sup> | Specific ligand         | O |
| 2Q5R | 2JG1 | ANP     | 1 <sup>st</sup> | Cofactor analog         | O |
| 2Q6Z | 1R3Q | ICP     | 1 <sup>st</sup> | Reaction product        | O |
| 2QBV | 5CKX | TSA     | 1 <sup>st</sup> | Transition state analog | O |
| 2QDK | 1RXU | THM     | 1 <sup>st</sup> | Substrate analog        | O |
| 2QEV | 2QEH | SRO     | 1 <sup>st</sup> | Specific ligand         | O |
| 2QSU | 3DP9 | BIG     | 1 <sup>st</sup> | Substrate analog        | O |
| 2QVL | 2QV7 | ADP     | 1 <sup>st</sup> | Reaction product        | O |
| 2QYS | 3C1O | NAP     | 1 <sup>st</sup> | Cofactor                | O |
| 2R60 | 3S27 | FRU     | 1 <sup>st</sup> | Substrate               | O |
| 2RG7 | 2R7A | HEM     | 1 <sup>st</sup> | Specific ligand         | O |
| 2RJD | 3H6Z | Peptide | 3 <sup>rd</sup> | Specific ligand         | O |
| 2SGA | 3NCL | CCZ     | 1 <sup>st</sup> | Specific inhibitor      | O |
| 2SIL | 2AH2 | FSI     | 1 <sup>st</sup> | Inhibitor               | O |
| 2TS1 | 3TZL | TRP     | 1 <sup>st</sup> | Substrate analog        | O |
| 2UYO | 1RJD | SAM     | 1 <sup>st</sup> | Cofactor                | O |
| 2V78 | 3QAI | XNN     | 1 <sup>st</sup> | Inhibitor               | O |
| 2VFB | 4B55 | P18     | 1 <sup>st</sup> | Specific inhibitor      | O |
| 2VFY | 2VFK | AMP     | 1 <sup>st</sup> | Specific ligand         | O |
| 2VQ4 | 2V8L | GLC     | 1 <sup>st</sup> | Natural ligand          | O |
| 2VUA | 3RSJ | GAL     | 1 <sup>st</sup> | Specific ligand         | O |
| 2WN4 | 1GIR | NDP     | 1 <sup>st</sup> | Substrate               | O |
| 2WVH | 2VBI | TPP     | 1 <sup>st</sup> | Cofactor                | O |
| 2WZT | 3D3F | NDP     | 1 <sup>st</sup> | Cofactor                | O |
| 2X5S | 2PA4 | UPG     | 1 <sup>st</sup> | Product analog          | O |
| 2YWB | 2YWB | AMP     | 1 <sup>st</sup> | Product analog          | O |
| 2YXF | 4RA3 | TFX     | 2 <sup>nd</sup> | Non-specific ligand     | O |
| 2YYA | 3RV3 | ADP     | 1 <sup>st</sup> | Reaction product        | O |
| 2YYT | 4MUZ | BMP     | 1 <sup>st</sup> | Specific inhibitor      | O |
| 2YZG | 1EZ1 | ANP     | 1 <sup>st</sup> | Substrate analog        | O |
| 2ZBS | 5DKS | 5C6     | 1 <sup>st</sup> | Specific ligand         | O |
| 2ZCG | 4MUZ | BMP     | 1 <sup>st</sup> | Specific inhibitor      | O |
| 2ZCO | 3WEH | PS7     | 1 <sup>st</sup> | Reaction intermediate   | O |
| 2ZGL | 2R0H | CTO     | 1 <sup>st</sup> | Natural ligand          | O |
| 2ZHY | 3KE5 | ATP     | 1 <sup>st</sup> | Substrate               | O |
| 2ZJ8 | 4F93 | ATP     | 1 <sup>st</sup> | Substrate               | O |
| 2ZTY | 3ZZD | G85     | 1 <sup>st</sup> | Specific inhibitor      | O |
| 3A0Y | 3TZ5 | ADP     | 1 <sup>st</sup> | Reaction product        | O |
| 3A5Q | 2D52 | COA     | 1 <sup>st</sup> | Substrate               | O |
| 3AAP | 3CJA | ANP     | 1 <sup>st</sup> | Specific inhibitor      | O |
| 3ADO | 4OM8 | NAD     | 1 <sup>st</sup> | Cofactor                | O |
| 3APP | 3K5C | OBI     | 1 <sup>st</sup> | Specific inhibitor      | O |
| 3B3G | 2FYT | SAH     | 1 <sup>st</sup> | Cofactor                | O |
| 3BA1 | 4NJO | NAD     | 1 <sup>st</sup> | Cofactor analog         | O |
| 3BLM | 4XUZ | 4D6     | 1 <sup>st</sup> | inhibitor               | O |
| 3BTV | 3NTQ | NAD     | 1 <sup>st</sup> | Specific ligand         | O |
| 3BUE | 2ZfZ | ARG     | 1 <sup>st</sup> | Natural ligand          | O |
| 3BYL | 1W2T | SUC     | 1 <sup>st</sup> | Substrate               | O |

|      |      |         |                 |                               |   |
|------|------|---------|-----------------|-------------------------------|---|
| 3C2E | 1QPQ | NTM     | 1 <sup>st</sup> | Substrate                     | O |
| 3C8N | 3B4Y | F42     | 1 <sup>st</sup> | Cofactor                      | O |
| 3CAF | 3CU1 | SCR     | 2 <sup>nd</sup> | Specific ligand               | O |
| 3CB6 |      |         |                 | <b>No significant results</b> |   |
| 3CGZ | 4PL9 | ADP     | 1 <sup>st</sup> | Reaction product              | O |
| 3COU | 2A8S | GTP     | 2 <sup>nd</sup> | Substrate analog              | O |
| 3CQ1 | 3CQ3 | MG      | 1 <sup>st</sup> | Non-specific ligand           | I |
| 3CRM | 2ZE7 | DST     | 2 <sup>nd</sup> | Substrate analog              | O |
| 3CSR | 3CT5 | NAG     | 1 <sup>st</sup> | Substrate analog              | O |
| 3CTB | 4OK1 | 198     | 1 <sup>st</sup> | Specific agonist              | O |
| 3D0O | 1UXJ | NAD     | 1 <sup>st</sup> | Cofactor                      | O |
| 3D95 | 1FE3 | OLA     | 1 <sup>st</sup> | Ligand analog                 | O |
| 3DRD | 4ATP | PLP     | 1 <sup>st</sup> | Cofactor                      | O |
| 3DRE | 4V7N | ADP     | 1 <sup>st</sup> | Reaction product              | O |
| 3DUL | 5FHQ | SAM     | 1 <sup>st</sup> | Cofactor                      | O |
| 3E1S | 4C30 | ANP     | 1 <sup>st</sup> | Substrate analog              | O |
| 3E5B | 2HJP | PPR     | 1 <sup>st</sup> | Substrate analog              | O |
| 3EIZ | 2AU9 | MG      | 1 <sup>st</sup> | Specific ligand               | I |
| 3EK6 | 2J4L | UTP     | 1 <sup>st</sup> | Specific inhibitor            | O |
| 3ETF | 4I8P | NAD     | 1 <sup>st</sup> | Cofactor                      | O |
| 3EX9 | 3JUM | AOD     | 2 <sup>nd</sup> | Reaction intermediate analog  | O |
| 3EXR | 1XBZ | LX1     | 1 <sup>st</sup> | Reaction product              | O |
| 3F1L | 1VL8 | NAP     | 1 <sup>st</sup> | Cofactor                      | O |
| 3F6F | 2IMI | GSH     | 1 <sup>st</sup> | Substrate                     | O |
| 3FTD | 4GC9 | SAM     | 1 <sup>st</sup> | Cofactor                      | O |
| 3FV6 | 4QFG | AMP     | 1 <sup>st</sup> | Natural ligand analog         | O |
| 3G1S | 3VE7 | BMP     | 1 <sup>st</sup> | Specific inhibitor            | O |
| 3GBT | 1BWF | GOL     | 1 <sup>st</sup> | Substrate analog              | O |
| 3GD0 | 3GD9 | BCG     | 1 <sup>st</sup> | Substrate/product analog      | O |
| 3GLK | 3OUZ | ADP     | 1 <sup>st</sup> | Reaction product              | O |
| 3GPG | 3GQO | APR     | 1 <sup>st</sup> | Specific ligand               | O |
| 3GQH | 3SUC | ATP     | 1 <sup>st</sup> | Specific ligand               | O |
| 3GSZ | 3CSO | XNI     | 1 <sup>st</sup> | Inhibitor                     | O |
| 3H2G | 2XLC | DEP     | 1 <sup>st</sup> | Specific inhibitor            | O |
| 3H38 | 1MIY | CTP     | 1 <sup>st</sup> | Substrate                     | O |
| 3H49 | 3QAI | XNN     | 1 <sup>st</sup> | Specific inhibitor            | O |
| 3H71 | 2YA7 | ZMR     | 1 <sup>st</sup> | Specific inhibitor            | O |
| 3HBH | 3HBD | MXE     | 1 <sup>st</sup> | Substrate mimic               | O |
| 3HIS | 1MRG | ADN     | 1 <sup>st</sup> | Substrate analog              | O |
| 3HJ4 | 2Q0D | ATP     | 1 <sup>st</sup> | Substrate analog              | O |
| 3HNX | 3HP8 | SUC     | 1 <sup>st</sup> | Specific ligand               | O |
| 3I0C | 5C1H | DA8     | 1 <sup>st</sup> | Inhibitor                     | O |
| 3I3I | 1KQU | BR4     | 1 <sup>st</sup> | Substrate analog              | O |
| 3I8S | 4R98 | GNH     | 1 <sup>st</sup> | Substrate analog              | O |
| 3IK8 | 3IKD | J9Z     | 1 <sup>st</sup> | Specific inhibitor            | O |
| 3ILY | 3ROF | Peptide | 8 <sup>th</sup> | Substrate mimic               | O |
| 3ITY | 3ITL | LRH     | 1 <sup>st</sup> | Reaction product              | O |
| 3IUJ | 1O6F | PRO     | 1 <sup>st</sup> | Substrate analog              | O |
| 3JYL | 1H2B | NAJ     | 1 <sup>st</sup> | Cofactor                      | O |
| 3K0M | 2POY | Peptide | 1 <sup>st</sup> | Specific ligand               | O |
| 3KAJ | 3KAL | HGS     | 1 <sup>st</sup> | Reaction product              | O |
| 3KDH | 3NMV | PYV     | 1 <sup>st</sup> | Natural ligand analog         | O |

|      |      |     |                 |                        |   |
|------|------|-----|-----------------|------------------------|---|
| 3KJE | 1G3R | ACP | 1 <sup>st</sup> | Substrate analog       | O |
| 3KJT | 5HZ7 | MLR | 1 <sup>st</sup> | Natural ligand analog  | O |
| 3KP7 | 4EJW | SRY | 1 <sup>st</sup> | Specific inhibitor     | O |
| 3KR9 | 3KU1 | SAM | 1 <sup>st</sup> | Cofactor               | O |
| 3KX7 | 3KVU | ACO | 2 <sup>nd</sup> | Substrate analog       | O |
| 3LIG | 3PIJ | FRU | 1 <sup>st</sup> | Substrate mimic        | O |
| 3LOI | 3LZZ | GDP | 2 <sup>nd</sup> | Specific ligand        | O |
| 3LXZ | 4IS0 | GDS | 1 <sup>st</sup> | Substrate analog       | O |
| 3M4D | 3M4E | BCD | 2 <sup>nd</sup> | Natural ligand         | O |
| 3N6J | 1ECQ | MG  | 1 <sup>st</sup> | Specific ligand        | I |
| 3NK6 | 3NK7 | SAM | 1 <sup>st</sup> | Cofactor               | O |
| 3PTE | 3O88 | BSH | 1 <sup>st</sup> | Specific inhibitor     | O |
| 3SSW | 1JHG | TRP | 1 <sup>st</sup> | Specific ligand        | O |
| 3VZT | 3A2S | SUC | 4 <sup>th</sup> | Specific ligand        | O |
| 4AKE | 4EDH | ADP | 1 <sup>st</sup> | Reaction Product       | O |
| 4PGM | 2IKQ | PO4 | 1 <sup>st</sup> | Reaction product       | O |
| 4PTI | 3LDJ | SCR | 2 <sup>nd</sup> | Specific ligand analog | O |

Table 4: Table 4: LIBRA-WA's ligand/binding site recognition performance excluding from the ligand binding sites database the holo proteins present in the LigaSite non-redundant dataset (Dessailly *et al.*, 2008). APO and HOLO Protein ID are the PDB codes of the corresponding three-dimensional structures. Ligand ID is the ligand name abbreviation used in the Protein Data Bank.

| APO Protein ID | HOLO Protein ID | Ligand ID | Rank            | Ligand details         |
|----------------|-----------------|-----------|-----------------|------------------------|
| 180L           | 186L            | N4B       | 1 <sup>st</sup> | Specific ligand analog |
| 1A4U           | 1MG5            | NAI       | 1 <sup>st</sup> | Cofactor               |
| 1ADE           | 2V40            | GDP       | 1 <sup>st</sup> | Substrate              |
| 1AK1           | 1C9E            | MP1       | 1 <sup>st</sup> | Substrate analog       |
| 1AKZ           | 2C53            | DUR       | 5 <sup>th</sup> | Substrate analog       |
| 1ARB           | 4NSV            | 2OY       | 1 <sup>st</sup> | Specific inhibitor     |
| 1ARL           | 3FVL            | BHK       | 1 <sup>st</sup> | Specific inhibitor     |
| 1B8E           | 3NQ3            | DKA       | 2 <sup>nd</sup> | Substrate analog       |
| 1B8P           | 1BMD            | NAD       | 1 <sup>st</sup> | Cofactor               |
| 1BD9           | 2B7A            | OPE       | 1 <sup>st</sup> | Natural ligand analog  |
| 1BK7           | 1UCA            | U2P       | 1 <sup>st</sup> | Reaction product       |
| 1BKZ           | 4UW6            | VV7       | 1 <sup>st</sup> | Natural ligand         |
| 1BQC           | 2MAN            | MAN       | 1 <sup>st</sup> | Reaction product       |
| 1BYI           | 3QXS            | NAP       | 3 <sup>rd</sup> | Substrate analog       |
| 1C48           | 1BOS            | GLA       | 1 <sup>st</sup> | Natural ligand         |
| 1C5H           | 2B46            | XYP       | 1 <sup>st</sup> | Reaction product       |
| 1CEO           | 3AOF            | BMA       | 1 <sup>st</sup> | Substrate              |
| 1CEX           | 1XZL            | HEE       | 1 <sup>st</sup> | Covalent inhibitor     |
| 1CPJ           | 2DC7            | 042       | 1 <sup>st</sup> | Covalent inhibitor     |
| 1CRW           | 2B4R            | NAD       | 1 <sup>st</sup> | Cofactor               |
| 1CWY           | 2OWC            | ACR       | 1 <sup>st</sup> | Specific inhibitor     |
| 1DCO           | 2V6T            | H2B       | 3 <sup>rd</sup> | Substrate-like ligand  |
| 1DHN           | 1RRY            | 204       | 1 <sup>st</sup> | Inhibitor              |
| 1DQ0           | 4P9W            | R3M       | 1 <sup>st</sup> | Specific ligand analog |
| 1DUP           | 1SYL            | DUT       | 1 <sup>st</sup> | Substrate analog       |
| 1E4F           | 4A2B            | AGS       | 1 <sup>st</sup> | Substrate analog       |

|      |      |      |                   |                               |
|------|------|------|-------------------|-------------------------------|
| 1E5L | 2QG4 | NAD  | 135 <sup>th</sup> | Cofactor                      |
| 1E8Y | 3L13 | JZW  | 1 <sup>st</sup>   | Specific inhibitor            |
| 1EDQ | 1X6N | AO3  | 1 <sup>st</sup>   | Specific inhibitor            |
| 1EPA | 2RA6 | ETY  | 1 <sup>st</sup>   | Ligand analog                 |
| 1EWZ | 2WGI | PNM  | 1 <sup>st</sup>   | Specific inhibitor            |
| 1EY0 | 1A2T | THP  | 1 <sup>st</sup>   | Specific inhibitor            |
| 1EZI | 1QWJ | NCC  | 1 <sup>st</sup>   | Reaction product              |
| 1F14 | 1F0Y | NAI  | 1 <sup>st</sup>   | Cofactor                      |
| 1F1S | 2BRP | SIE  | 1 <sup>st</sup>   | Specific inhibitor            |
| 1F2V | 4AU1 | P8X  | 1 <sup>st</sup>   | Reaction intermediate         |
| 1F41 | 1DVS | STL  | 1 <sup>st</sup>   | Specific inhibitor            |
| 1F5Z | 4IMF | SI3  | 1 <sup>st</sup>   | Substrate                     |
| 1FCQ | 2ATM | MES  | 1 <sup>st</sup>   | Substrate analog              |
| 1FGB | 1JQY | A32  | 1 <sup>st</sup>   | Specific inhibitor            |
| 1FO9 | 2APC | UDM  | 1 <sup>st</sup>   | Substrate analog              |
| 1FSF | 1NE7 | AGP  | 1 <sup>st</sup>   | Specific inhibitor            |
| 1FTF | 3HYK | A3P  | 1 <sup>st</sup>   | Reaction product              |
| 1FTR |      |      |                   | <b>No significant results</b> |
| 1FWL | 3BY5 | NAI  | 2 <sup>nd</sup>   | Substrate analog              |
| 1G40 | 1Y8E | SVR  | 9 <sup>th</sup>   | Competitive inhibitor         |
| 1G4E | 1G4S | TPS  | 1 <sup>st</sup>   | Reaction product              |
| 1G95 | 2W0W | LZS  | 1 <sup>st</sup>   | Inhibitor                     |
| 1GBS | 154L | NAG  | 2 <sup>nd</sup>   | Substrate analog              |
| 1GCE | 1LLB | PCN  | 1 <sup>st</sup>   | Inhibitor                     |
| 1GFS | 1E6U | NAP  | 1 <sup>st</sup>   | Reaction product              |
| 1GOU | 1GMP | 2GP  | 1 <sup>st</sup>   | Substrate analog              |
| 1GSH | 3R5X | ATP  | 1 <sup>st</sup>   | Cofactor                      |
| 1GWK | 1W8U | BMA  | 1 <sup>st</sup>   | Natural ligand                |
| 1GY0 | 1OG4 | NAI  | 1 <sup>st</sup>   | Cofactor                      |
| 1HK9 | 3QO3 | ATP  | 1 <sup>st</sup>   | Natural ligand                |
| 1HKA | 3ILJ | APC  | 2 <sup>nd</sup>   | Inhibitor                     |
| 1HM5 | 4QFH | G6P  | 1 <sup>st</sup>   | Reaction product              |
| 1HNK | 4NHD | COEA | 1 <sup>st</sup>   | Product                       |
| 1HO1 | 3F4N | PXP  | 1 <sup>st</sup>   | Reaction product              |
| 1I7N | 1AUX | AGS  | 1 <sup>st</sup>   | Ligand analog                 |
| 1IAD | 1QJJ | HOA  | 1 <sup>st</sup>   | Inhibitor                     |
| 1ILV | 2E6B | WO4  | 5 <sup>th</sup>   | Specific inhibitor            |
| 1INL | 2O0L | S4M  | 1 <sup>st</sup>   | Substrate analog              |
| 1J85 | 4JAL | SAH  | 1 <sup>st</sup>   | Cofactor                      |
| 1J8S |      |      |                   | <b>No significant results</b> |
| 1JCF | 4CZJ | ANP  | 1 <sup>st</sup>   | Substrate analog              |
| 1JKS | 3ZXT | ACP  | 1 <sup>st</sup>   | Substrate analog              |
| 1JXO |      |      |                   | <b>No significant results</b> |
| 1JYK | 2O63 | UDP  | 20 <sup>th</sup>  | Substrate analog              |
| 1K0M | 4K0N | MAL  | 38 <sup>th</sup>  | Natural ligand mimic          |
| 1K3O | 4HJ2 | LZ6  | 1 <sup>st</sup>   | Substrate analog              |
| 1K6A | 1B30 | XYP  | 1 <sup>st</sup>   | Reaction product              |
| 1KAM | 1YUM | NCN  | 1 <sup>st</sup>   | Cofactor                      |
| 1KF5 | 1R5C | CPA  | 1 <sup>st</sup>   | Substrate analog              |
| 1KHD | 1ZXY | PRP  | 1 <sup>st</sup>   | Substrate                     |
| 1KN9 | 1B12 | IPN  | 1 <sup>st</sup>   | Specific inhibitor            |



|      |      |     |                  |                               |
|------|------|-----|------------------|-------------------------------|
| 1KPA | 3RHN | 5GP | 1 <sup>st</sup>  | Substrate                     |
| 1KWB | 1EIR | BPY | 1 <sup>st</sup>  | Substrate                     |
| 1L7D | 1NM5 | NAD | 1 <sup>st</sup>  | Substrate                     |
| 1LBV | 1LBY | F6P | 1 <sup>st</sup>  | Product                       |
| 1LC1 | 1BA3 | MBR | 1 <sup>st</sup>  | Inhibitor                     |
| 1LF4 | 1LF2 | R37 | 1 <sup>st</sup>  | Inhibitor                     |
| 1LTU | 1DMW | HBI | 1 <sup>st</sup>  | Cofactor                      |
| 1M1Z | 3SEZ | ATP | 1 <sup>st</sup>  | Substrate                     |
| 1MKB | 4KEH | 1r3 | 1 <sup>st</sup>  | Substrate analog              |
| 1MMI | 3QSB | 743 | 1 <sup>st</sup>  | Specific inhibitor            |
| 1MR7 | 4HUR | ACO | 1 <sup>st</sup>  | Substrate                     |
| 1MTZ | 1XRQ | LEU | 1 <sup>st</sup>  | Substrate                     |
| 1MWK | 4A61 | ANP | 1 <sup>st</sup>  | Substrate analog              |
| 1MZL | 1UVC | STE | 1 <sup>st</sup>  | Natural ligand                |
| 1N05 | 1NB9 | RBF | 1 <sup>st</sup>  | Substrate                     |
| 1NDB | 2H3P | ACO | 1 <sup>st</sup>  | Substrate                     |
| 1NON | 4P86 | 5GP | 1 <sup>st</sup>  | Substrate analog              |
| 1NXM | 1DZT | ATY | 1 <sup>st</sup>  | Substrate analog              |
| 1O24 | 4KAT | FDA | 1 <sup>st</sup>  | Cofactor                      |
| 1OEM | 2QBP | 527 | 1 <sup>st</sup>  | Inhibitor                     |
| 1OFP | 1OF6 | DTY | 1 <sup>st</sup>  | Specific inhibitor            |
| 1OGH | 3TPS | DUP | 4 <sup>th</sup>  | Substrate analog              |
| 1OGL | 2YB0 | DUR | 1 <sup>st</sup>  | Substrate analog              |
| 1OGM | 3WWG | BGC | 1 <sup>st</sup>  | Substrate analog              |
| 1OJQ |      |     |                  | <b>No significant results</b> |
| 1OLZ |      |     |                  | <b>No significant results</b> |
| 1OOI | 3B88 | ETE | 1 <sup>st</sup>  | Substrate analog              |
| 1OPY | 3OWY | EQU | 1 <sup>st</sup>  | Transition state analog       |
| 1OXT | 3C4J | AGS | 1 <sup>st</sup>  | Nucleotide analogs            |
| 1PIX | 1JCJ | HPD | 1 <sup>st</sup>  | Reaction intermediate         |
| 1P5H | 1T3Z | CAO | 1 <sup>st</sup>  | Substrate analog              |
| 1P74 | 3PHJ | DHK | 1 <sup>st</sup>  | Reaction product              |
| 1PDB | 1BOZ | NDP | 1 <sup>st</sup>  | Cofactor                      |
| 1PNG | 3PMS | GOL | 1 <sup>st</sup>  | Non-specific ligand           |
| 1Q52 | 4QII | 2NE | 1 <sup>st</sup>  | Substrate analog              |
| 1Q7M | 2E7F | 2CF | 1 <sup>st</sup>  | Substrate analog              |
| 1QCZ | 2FWP | ICR | 1 <sup>st</sup>  | Substrate                     |
| 1QID | 1H23 | E12 | 1 <sup>st</sup>  | Specific inhibitor            |
| 1QTO | 4IAG | GOL | 1 <sup>st</sup>  | Non-specific ligand           |
| 1QTR | 1MU0 | PHK | 22 <sup>nd</sup> | Inhibitor                     |
| 1R0M | 1SJB | OSB | 1 <sup>st</sup>  | Product                       |
| 1R12 | 3ZWP | AVU | 1 <sup>st</sup>  | Substrate analog              |
| 1R29 | 4CP3 | RBT | 1 <sup>st</sup>  | Specific inhibitor            |
| 1R15 | 3BGV | SAH | 1 <sup>st</sup>  | Reaction product              |
| 1RIQ | 3HXQ | A5A | 1 <sup>st</sup>  | Substrate analog              |
| 1RJ1 | 2CJ7 | IOD | 1 <sup>st</sup>  | Non-specific ligand           |
| 1RKM |      |     |                  | <b>No significant results</b> |
| 1RZV | 3CX4 | GLC | 1 <sup>st</sup>  | Substrate                     |
| 1S2L | 1S2D | AR4 | 1 <sup>st</sup>  | Substrate analog              |
| 1S7K |      |     |                  | <b>No significant results</b> |
| 1SGK | 1DTP | APU | 1 <sup>st</sup>  | Substrate analog              |
| 1SGZ | 3I25 | MV7 | 1 <sup>st</sup>  | Specific inhibitor            |

|      |      |     |                   |                               |
|------|------|-----|-------------------|-------------------------------|
| 1SJY | 1SOI | SM  | 1 <sup>st</sup>   | Non-specific ligand           |
| 1SNT | 2F25 | DAN | 1 <sup>st</sup>   | Inhibitor                     |
| 1SQG | 4FP9 | SAM | 1 <sup>st</sup>   | Cofactor                      |
| 1SUL |      |     |                   | <b>No significant results</b> |
| 1SWH | 3WZP | ZOF | 1 <sup>st</sup>   | Specific ligand analog        |
| 1TGN | 1C2F | BAH | 1 <sup>st</sup>   | Specific inhibitor            |
| 1THV | 4TVT | NA  | 2 <sup>nd</sup>   | Non-specific ligand           |
| 1TIB | 1GT6 | OLA | 1 <sup>st</sup>   | Reaction product              |
| 1TJE | 1TKE | SER | 1 <sup>st</sup>   | Substrate analog              |
| 1TJV | 1DCN | AS1 | 1 <sup>st</sup>   | Substrate analog              |
| 1TVN | 4A3H | DCB | 1 <sup>st</sup>   | Substrate analog              |
| 1TW0 | 2QIM | ZEA | 3 <sup>rd</sup>   | Non-specific ligand           |
| 1TYF | 1TG6 | FME | 113 <sup>th</sup> | Reaction product              |
| 1TYV | 3TH0 | PZU | 1 <sup>st</sup>   | Natural ligand analog         |
| 1TZV |      |     |                   | <b>No significant results</b> |
| 1U0T | 4DY6 | A22 | 1 <sup>st</sup>   | Substrate analog              |
| 1U7U |      |     |                   | <b>No significant results</b> |
| 1UAJ | 1P9P | SAH | 1 <sup>st</sup>   | Substrate analog              |
| 1UBI | 4WZP | SEP | 1 <sup>st</sup>   | Specific ligand               |
| 1UF4 | 1UF5 | CDT | 1 <sup>st</sup>   | Substrate                     |
| 1ULU | 2QIO | NAD | 1 <sup>st</sup>   | Cofactor                      |
| 1UMF |      |     |                   | <b>No significant results</b> |
| 1UXZ | 1W9W | BGC | 1 <sup>st</sup>   | Specific ligand               |
| 1UYL | 3T0Z | ATP | 1 <sup>st</sup>   | Substrate                     |
| 1V0S | 2ZE9 | PD7 | 1 <sup>st</sup>   | Reaction product              |
| 1V6Z | 3KW2 | ADN | 3 <sup>rd</sup>   | Substrate analog              |
| 1V77 |      |     |                   | <b>No significant results</b> |
| 1VFJ | 4CNZ | ADP | 1 <sup>st</sup>   | Specific ligand               |
| 1VIC | 1H7H | CDP | 1 <sup>st</sup>   | Substrate analog              |
| 1VJU |      |     |                   | <b>No significant results</b> |
| 1VPN | 1SIE | SIA | 1 <sup>st</sup>   | Specific ligand               |
| 1W9A | 4QVB | F42 | 1 <sup>st</sup>   | Cofactor                      |
| 1WJG | 3QTB | D5M | 1 <sup>st</sup>   | Reaction product analog       |
| 1WNY | 1WK8 | VMS | 1 <sup>st</sup>   | Substrate analog              |
| 1WOS | 3AOI | C2F | 1 <sup>st</sup>   | Reaction product analog       |
| 1WS9 | 2DVL | FAD | 1 <sup>st</sup>   | Cofactor                      |
| 1WTJ |      |     |                   | <b>No significant results</b> |
| 1WXF | 1EE1 | ATP | 1 <sup>st</sup>   | Substrate analog              |
| 1X56 | 2XTI | NB8 | 1 <sup>st</sup>   | Substrate analog              |
| 1X7O | 1ZJR | GOL | 40 <sup>th</sup>  | Substrate analog              |
| 1X8F | 2NXH | PEP | 1 <sup>st</sup>   | Substrate                     |
| 1XIX |      |     |                   | <b>No significant results</b> |
| 1XK7 | 1XA4 | COA | 1 <sup>st</sup>   | Substrate analog              |
| 1XO6 | 3IB9 | BTN |                   | Substrate                     |
| 1XQO |      |     |                   | <b>No significant results</b> |
| 1XW2 | 2B4F | XYP | 1 <sup>st</sup>   | Reaction product              |
| 1Y2Q | 3PD2 | A3S | 1 <sup>st</sup>   | Substrate analog              |
| 1Y2T | 2OFD | NGA | 1 <sup>st</sup>   | Endogenous ligand             |
| 1YBT | 1WC1 | TAT | 61 <sup>st</sup>  | Substrate analog              |
| 1YVY | 1AQ2 | ATP | 1 <sup>st</sup>   | Substrate                     |
| 1Z7G | 4RAB | 3L3 | 1 <sup>st</sup>   | Specific inhibitor            |
| 1ZAH | 3MMT | 2FP | 1 <sup>st</sup>   | Substrate                     |
| 1ZCU | 1LL2 | UPG | 1 <sup>st</sup>   | Substrate                     |

|      |      |     |                  |                               |
|------|------|-----|------------------|-------------------------------|
| 1ZNW | 2F3T | LGP | 1 <sup>st</sup>  | Substrate analog              |
| 1ZTY |      |     |                  | <b>No significant results</b> |
| 1ZUH | 1ZUI | SKM | 1 <sup>st</sup>  | Substrate                     |
| 2A6Z |      |     |                  | <b>No significant results</b> |
| 2A8F | 1LRI | CLR | 1 <sup>st</sup>  | Specific ligand               |
| 2AD1 | 1B06 | VO4 | 2 <sup>nd</sup>  | Transition state analog       |
| 2AHF | 2FUZ | MPD | 1 <sup>st</sup>  | Non-specific ligand           |
| 2AHU |      |     |                  | <b>No significant results</b> |
| 2AMJ | 3RPE | FAD | 1 <sup>st</sup>  | Cofactor                      |
| 2B0J | 3F46 | I2C | 1 <sup>st</sup>  | Cofactor                      |
| 2B6P | 2B6O | MC3 | 1 <sup>st</sup>  | Specific ligand analog        |
| 2B78 | 3VSE | SAH | 1 <sup>st</sup>  | Cofactor                      |
| 2B98 |      |     |                  | <b>No significant results</b> |
| 2BGT | 1NZF | GOL | 1 <sup>st</sup>  | Substrate analog              |
| 2BJW | 2VII | AMP | 1 <sup>st</sup>  | Substrate analog              |
| 2BOE | 2BOD | BGC | 1 <sup>st</sup>  | Reaction product              |
| 2C61 | 3B2Q | ATP | 1 <sup>st</sup>  | Reaction product              |
| 2C7I | 3R07 | MPD | 1 <sup>st</sup>  | Substrate analog              |
| 2CAR |      |     |                  | <b>No significant results</b> |
| 2CHS | 3ZP7 | ISJ | 1 <sup>st</sup>  | Substrate                     |
| 2CI3 | 2CI1 | KOR | 1 <sup>st</sup>  | Specific inhibitor            |
| 2CWK | 2HVD | ADP | 1 <sup>st</sup>  | Substrate                     |
| 2CX5 |      |     |                  | <b>No significant results</b> |
| 2D59 | 3Q9N | COA | 1 <sup>st</sup>  | Natural ligand                |
| 2DHQ | 3N76 | CA2 | 1 <sup>st</sup>  | Specific inhibitor            |
| 2DJ6 | 1Y13 | BIO | 1 <sup>st</sup>  | Substrate                     |
| 2DKA | 3UW2 | ZN  | 93 <sup>rd</sup> | Inhibitor                     |
| 2DPS | 2Z3P | LEU | 1 <sup>st</sup>  | Substrate                     |
| 2DQW | 1EYE | PMM | 1 <sup>st</sup>  | Substrate analog              |
| 2E0C | 1XKD | NAP | 1 <sup>st</sup>  | Substrate                     |
| 2E0K | 1S4D | GOL | 6 <sup>th</sup>  | Substrate analog              |
| 2E10 | 1WQW | BT5 | 1 <sup>st</sup>  | Substrate analog              |
| 2E1V | 2XR7 | MLC | 5 <sup>th</sup>  | Substrate                     |
| 2E3S | 2Z9Z | DDR | 1 <sup>st</sup>  | Substrate                     |
| 2ECR | 1RZ1 | NAD | 1 <sup>st</sup>  | Cofactor                      |
| 2EX0 | 3S44 | FN5 | 1 <sup>st</sup>  | Substrate analog              |
| 2F82 | 2WYA | HMG | 1 <sup>st</sup>  | Reaction product              |
| 2F9T | 3BF3 | PAZ | 1 <sup>st</sup>  | Reaction product              |
| 2FK7 | 1KP1 | SAH | 1 <sup>st</sup>  | Cofactor                      |
| 2FP8 | 2V91 | S55 | 1 <sup>st</sup>  | Substrate                     |
| 2FSF | 3BXZ | ADP | 1 <sup>st</sup>  | Reaction product              |
| 2G67 | 3AI7 | TPP | 1 <sup>st</sup>  | Reaction intermediate         |
| 2G95 | 4M6Q | 20T | 1 <sup>st</sup>  | Specific inhibitor            |
| 2GFV | 4C70 | TLJ | 1 <sup>st</sup>  | Inhibitor                     |
| 2GG4 | 1RF6 | S3P | 1 <sup>st</sup>  | Substrate                     |
| 2GQV | 2P4T | NAP | 4 <sup>th</sup>  | Cofactor                      |
| 2GSF | 4P5Z | Q7M | 1 <sup>st</sup>  | Specific inhibitor            |
| 2GT2 | 2GT4 | GDD | 1 <sup>st</sup>  | Substrate                     |
| 2GUB | 4QDW | LAI | 1 <sup>st</sup>  | Reaction intermediate         |
| 2GWX | 3GWX | EPA | 1 <sup>st</sup>  | Natural ligand                |
| 2GYY | 4R3N | NAP | 1 <sup>st</sup>  | Cofactor                      |
| 2H2Z | 2A5K | AZP | 1 <sup>st</sup>  | Inhibitor                     |

|      |      |     |                  |                               |
|------|------|-----|------------------|-------------------------------|
| 2HBJ | 2HBK | MN  | 1 <sup>st</sup>  | Cofactor                      |
| 2HIV | 4EQ5 | AMP | 1 <sup>st</sup>  | Reaction product              |
| 2HK0 | 3VNL | TAG | 1 <sup>st</sup>  | Substrate                     |
| 2HVM | 1KQY | NAG | 1 <sup>st</sup>  | Substrate                     |
| 2HY7 |      |     |                  | <b>No significant results</b> |
| 2HZR | 40SD | PLM | 1 <sup>st</sup>  | Natural ligand analog         |
| 2I4L | 2J3L | P5A | 1 <sup>st</sup>  | Substrate analog              |
| 2IOB | 3A2Y | TS5 | 1 <sup>st</sup>  | Substrate                     |
| 2IRU | 2FAR | DTP | 1 <sup>st</sup>  | Substrate analog              |
| 2J71 |      |     |                  | <b>No significant results</b> |
| 2J8N | 3DR8 | ACO | 1 <sup>st</sup>  | Cofactor                      |
| 2JBR |      |     |                  | <b>No significant results</b> |
| 2NWD | 4XAD | 3ZW | 1 <sup>st</sup>  | Substrate analog              |
| 2NXC | 3CJT | SAM | 1 <sup>st</sup>  | Cofactor                      |
| 2O9P | 2JIE | G2F | 1 <sup>st</sup>  | Product analog                |
| 2OAM | 2APG | FAD | 1 <sup>st</sup>  | Cofactor                      |
| 2OPT |      |     |                  | <b>No significant results</b> |
| 2OU1 | 4JGX | PLM | 1 <sup>st</sup>  | Natural ligand                |
| 2OVE | 1EPB | REA | 1 <sup>st</sup>  | Natural ligand analog         |
| 2PAW | 4HHY | 15R | 1 <sup>st</sup>  | Specific inhibitor            |
| 2PFK | 4XYK | ADP | 1 <sup>st</sup>  | Reaction product              |
| 2PKF | 4O1G | AGS | 1 <sup>st</sup>  | Substrate analog              |
| 2PPN | 1BL4 | AP1 | 1 <sup>st</sup>  | Specific ligand               |
| 2Q5R | 2JG1 | ANP | 1 <sup>st</sup>  | Substrate analog              |
| 2Q6Z | 1R3Q | ACP | 1 <sup>st</sup>  | Reaction product              |
| 2QBV | 2VKL | MLT | 1 <sup>st</sup>  | Product analog                |
| 2QDK | 1RXU | THM | 1 <sup>st</sup>  | Reaction product analog       |
| 2QEV | 2QEO | LNR | 1 <sup>st</sup>  | Natural ligand                |
| 2QSU | 2H8G | ADE | 1 <sup>st</sup>  | Reaction product              |
| 2QVL | 4WER | AMP | 1 <sup>st</sup>  | Reaction product analog       |
| 2QYS | 2QW8 | NAP | 1 <sup>st</sup>  | Cofactor                      |
| 2R60 | 2R66 | F6P | 1 <sup>st</sup>  | Substrate                     |
| 2RG7 | 1AIJ | BPH | 55 <sup>th</sup> | Endogenous ligand analog      |
| 2RJD | 3P8H | P8H | 1 <sup>st</sup>  | Specific inhibitor            |
| 2SGA | 2QAA | TYR | 1 <sup>st</sup>  | Reaction intermediate         |
| 2SIL | 1N1T | DAN | 1 <sup>st</sup>  | Specific inhibitor            |
| 2TS1 | 1VBM | YSA | 1 <sup>st</sup>  | Substrate analog              |
| 2UYO |      |     |                  | <b>No significant results</b> |
| 2V78 | 2DCN | ADP | 1 <sup>st</sup>  | Reaction product              |
| 2VFB | 4NV7 | COA | 1 <sup>st</sup>  | Cofactor                      |
| 2VFY | 4YEZ | A2P | 13 <sup>th</sup> | Specific ligand analog        |
| 2VQ4 | 4BFN | GLC | 2 <sup>nd</sup>  | Natural ligand                |
| 2VUA | 3RSJ | GAL | 7 <sup>th</sup>  | Natural ligand                |
| 2WN4 | 2WN6 | NDP | 1 <sup>st</sup>  | Cofactor                      |
| 2WVH | 3OE1 | TDL | 1 <sup>st</sup>  | Reaction intermediate         |
| 2WZT | 1S2C | FLF | 9 <sup>th</sup>  | Specific inhibitor            |
| 2X5S | 2X65 | M1P | 1 <sup>st</sup>  | Substrate                     |
| 2YWB | 1GPM | AMP | 1 <sup>st</sup>  | Product analog                |
| 2YXF | 1LDS | NA  | 10 <sup>th</sup> | Non-specific ligand           |
| 2YYA | 2XD4 | ADP | 1 <sup>st</sup>  | Substrate analog              |
| 2YYT | 2CZF | XMP | 1 <sup>st</sup>  | Product analog                |

|      |      |     |                  |                               |
|------|------|-----|------------------|-------------------------------|
| 2YZG | 4L1K | ANP | 1 <sup>st</sup>  | Substrate analog              |
| 2ZBS | 1S9Q | OHT | 1 <sup>st</sup>  | Natural ligand analog         |
| 2ZCG | 3MWA | UFT | 1 <sup>st</sup>  | Covalent inhibitor            |
| 2ZCO | 3ADZ | PS7 | 1 <sup>st</sup>  | Reaction intermediate         |
| 2ZGL | 2ZGO | LAT | 1 <sup>st</sup>  | Natural ligand analog         |
| 2ZHY | 3KE5 | ATP | 1 <sup>st</sup>  | Substrate                     |
| 2ZJ8 | 2I4I | AMP | 2 <sup>nd</sup>  | Specific ligand               |
| 2ZTY | 3ZZ9 | G83 | 1 <sup>st</sup>  | Specific inhibitor            |
| 3A0Y | 1Y8O | ADP | 38 <sup>th</sup> | Reaction product              |
| 3A5Q | 1CHW | HXC | 1 <sup>st</sup>  | Substrate analog              |
| 3AAP | 4BR7 | AU1 | 1 <sup>st</sup>  | Specific inhibitor            |
| 3ADO | 3F3S | NAD | 1 <sup>st</sup>  | Cofactor                      |
| 3APP | 1PPM | OP1 | 1 <sup>st</sup>  | Specific inhibitor            |
| 3B3G | 2Y1W | SFG | 1 <sup>st</sup>  | Cofactor analog               |
| 3BA1 | 2DBQ | NAP | 1 <sup>st</sup>  | Cofactor                      |
| 3BLM | 1GHP | PNM | 1 <sup>st</sup>  | Reaction intermediate         |
| 3BTV |      |     |                  | <b>No significant results</b> |
| 3BUE | 2ZFZ | ARG | 1 <sup>st</sup>  | Natural ligand                |
| 3BYL | 1PT2 | SUC | 1 <sup>st</sup>  | Substrate                     |
| 3C2E | 3C2R | PHT | 1 <sup>st</sup>  | Specific inhibitor            |
| 3C8N | 4ICC | MLY | 6 <sup>th</sup>  | Non-specific ligand           |
| 3CAF | 1E0O | SGN | 1 <sup>st</sup>  | Specific ligand               |
| 3CB6 |      |     |                  | <b>No significant results</b> |
| 3CGZ | 2GR7 | C8E | 1 <sup>st</sup>  | Specific inhibitor mimic      |
| 3COU | 2A8S | GTP | 1 <sup>st</sup>  | Substrate analog              |
| 3CQ1 |      |     |                  | <b>No significant results</b> |
| 3CRM | 3CRQ | DPO | 1 <sup>st</sup>  | Reaction product              |
| 3CSR |      |     |                  | <b>No significant results</b> |
| 3CTB | 1ILH | SRL | 1 <sup>st</sup>  | Specific agonist              |
| 3D0O | 1LDN | NAD | 1 <sup>st</sup>  | Cofactor                      |
| 3D95 | 1CBQ | RE9 | 1 <sup>st</sup>  | Natural ligand analog         |
| 3DRD | 3DOD | PLP | 1 <sup>st</sup>  | Cofactor                      |
| 3DRE | 3JU6 | ANP | 1 <sup>st</sup>  | Substrate analog              |
| 3DUL | 1SUS | SAH | 1 <sup>st</sup>  | Reaction product              |
| 3E1S | 2EWV | ADP | 11 <sup>th</sup> | Substrate analog              |
| 3E5B | 3POX | PYR | 1 <sup>st</sup>  | Reaction product analog       |
| 3EIZ | 3E1Y | POP | 1 <sup>st</sup>  | Substrate                     |
| 3EK6 | 2BND | UDP | 1 <sup>st</sup>  | Reaction product              |
| 3ETF | 4ITA | NDP | 1 <sup>st</sup>  | Cofactor                      |
| 3EX9 | 3FF0 | GOL | 1 <sup>st</sup>  | Substrate mimic               |
| 3EXR | 1KW1 | LG6 | 1 <sup>st</sup>  | Substrate analog              |
| 3FIL | 3GY0 | NAP | 1 <sup>st</sup>  | Cofactor                      |
| 3F6F | 1PN9 | GTX | 1 <sup>st</sup>  | Specific inhibitor            |
| 3FTD | 2ZBR | SFG | 1 <sup>st</sup>  | Cofactor analog               |
| 3FV6 | 2QR1 | ADP | 1 <sup>st</sup>  | Natural ligand                |
| 3G1S | 3G1F | 2OM | 1 <sup>st</sup>  | Substrate analog              |
| 3GBT | 2W41 | ADP | 2 <sup>nd</sup>  | Reaction product              |
| 3GD0 |      |     |                  | <b>No significant results</b> |
| 3GLK | 3JRX | S1A | 1 <sup>st</sup>  | Specific ligand               |
| 3GPG | 3GQO | APR | 1 <sup>st</sup>  | Specific ligand               |
| 3GQH |      |     |                  | <b>No significant results</b> |
| 3GSZ | 3BR9 | DEY | 1 <sup>st</sup>  | Specific inhibitor            |

---

|      |      |     |                  |                               |
|------|------|-----|------------------|-------------------------------|
| 3H2G | 1GKK | SEP | 2 <sup>nd</sup>  | Specific ligand               |
| 3H38 | 4WC0 | ATP | 1 <sup>st</sup>  | Substrate                     |
| 3H49 | 2FV7 | ADP | 1 <sup>st</sup>  | Reaction product              |
| 3H71 | 2YA6 | DAN | 1 <sup>st</sup>  | Specific inhibitor            |
| 3HBH | 2DKV | MES | 1 <sup>st</sup>  | Substrate mimic               |
| 3HIS | 2GA4 | ADE | 1 <sup>st</sup>  | Reaction product              |
| 3HJ4 | 4FHY | 3AT | 1 <sup>st</sup>  | Substrate analog              |
| 3HNX | 2YHH | MAN | 1 <sup>st</sup>  | Natural ligand                |
| 3I0C | 3V0N | 3GW | 1 <sup>st</sup>  | Specific inhibitor            |
| 3I3I | 1QLL | TDA | 1 <sup>st</sup>  | Specific inhibitor            |
| 3I8S | 3WIC | GNP | 1 <sup>st</sup>  | Substrate analog              |
| 3IK8 | 4TYO | 39X | 1 <sup>st</sup>  | Specific inhibitor            |
| 3ILY |      |     |                  | <b>No significant results</b> |
| 3ITY | 3ITV | PSJ | 1 <sup>st</sup>  | Substrate                     |
| 3IUJ | 4BCC | JKT | 2 <sup>nd</sup>  | Covalent inhibitor            |
| 3JYL | 1QOR | NDP | 1 <sup>st</sup>  | Cofactor                      |
| 3K0M | 4J5A | 67Z | 1 <sup>st</sup>  | Specific inhibitor            |
| 3KAJ | 2WYO | GSH | 1 <sup>st</sup>  | Product analog                |
| 3KDH | 3NJ0 | PYV | 1 <sup>st</sup>  | Natural ligand mimic          |
| 3KJE | 1YR7 | GSP | 1 <sup>st</sup>  | Substrate analog              |
| 3KJT | 4IKM | TYI | 1 <sup>st</sup>  | Modified amino acid           |
| 3KP7 | 4EJW | SRY | 1 <sup>st</sup>  | Specific inhibitor            |
| 3KR9 | 3DXY | SAM | 84 <sup>th</sup> | Substrate                     |
| 3KX7 | 3KVU | ACO | 1 <sup>st</sup>  | Cofactor                      |
| 3LIG | 3LFI | BGC | 1 <sup>st</sup>  | Substrate                     |
| 3LOI | 1XE8 | GUN | 3 <sup>rd</sup>  | Specific ligand analog        |
| 3LXZ | 3UBL | GSH | 1 <sup>st</sup>  | Substrate                     |
| 3M4D | 3M3R | BCD | 1 <sup>st</sup>  | Natural ligand                |
| 3N6J | 1ECQ | DXG | 1 <sup>st</sup>  | Substrate analog              |
| 3NK6 | 3GYQ | SAM | 1 <sup>st</sup>  | Substrate                     |
| 3PTE | 1YQS | BSA | 1 <sup>st</sup>  | Specific inhibitor            |
| 3SSW | 1ZT9 | TRP | 1 <sup>st</sup>  | Specific ligand               |
| 3VZT | 3VZU | ANP | 1 <sup>st</sup>  | Specific ligand               |
| 4AKE | 3LR3 | ADP | 1 <sup>st</sup>  | Reaction product              |
| 4PGM | 1E59 | VO3 | 1 <sup>st</sup>  | Specific inhibitor            |
| 4PTI | 1YLC | ABA | 1 <sup>st</sup>  | Modified amino acid           |

---

---

## REFERENCES

- Atzeni, P., Polticelli, F., Toti, D. (2011) A framework for semi-automatic identification, disambiguation and storage of protein-related abbreviations in scientific literature, *Proceedings - International Conference on Data Engineering*, **5767646**, 59-61
- Atzeni, P., Polticelli, F., Toti, D. (2011) An automatic identification and resolution system for protein-related abbreviations in scientific papers, *Lecture Notes in Computer Science*, **6623**, 171-176
- Brylinski, M., Skolnick, J. (2008) A threading-based method (FINDSITE) for ligand-binding site prediction and functional annotation. *Proc Natl Acad Sci U S A*, **105(1)**, 129-134
- Capra, J.A., Laskowski, R.A., Thornton, J.M., Singh, M., Funkhouser, T.A. (2009) Predicting Protein Ligand Binding Sites by Combining Evolutionary Sequence Conservation and 3D Structure. *PLoS Comput Biol*, **5(12)**
- Furnham, N., Holliday, G.L., de Beer, T.A., Jacobsen, J.O., Pearson, W.R., Thornton, J.M. (2014) The Catalytic Site Atlas 2, *Nucleic Acids Res.*, **42**, D485-D489
- Haas, J., Roth, S., Arnold, K., Kiefer, F., Schmidt, T., Bordoli, L., Schwede, T. (2013) The Protein Model Portal—a comprehensive resource for protein structure and model information, *Database (Oxford)*, 2013:bat031.
- Levy, et al., (2015) retrieved from the web, <http://home.wlu.edu/levys/software/kd/>
- Dessailly, B.H., et al. (2008) LigASite: a database of biologically relevant binding sites in proteins with known apo-structures, *Nucleic Acids Res*, **36**, 667-673
- Laskowski, R.A., et al. (2005a) ProFunc: a server for predicting protein function from 3D structure, *Nucleic Acids Res.*, **3**, W89-W93
- Laskowski, R.A., et al. (2005b) Protein function prediction using local 3D templates. *J Mol Biol*, **351**, 614-626
- Roy, A., Yang, J., Zhang, Y. (2012) COFACTOR: an accurate comparative algorithm for structure-based protein function annotation. *Nucleic Acids Research*, **40**, W471-W477
- Toti, D., Atzeni, P., Polticelli, F. (2012) Automatic Protein Abbreviations Discovery and Resolution from Full-Text Scientific Papers: The PRAISED Framework, *Bio-Algorithms and Med-Systems*, **8**, 13-
- Viet Hung, L., Caprari, S., Bizai, M., Toti, D., Polticelli, F. (2015) LIBRA: LIgand Binding site Recognition Application, *Bioinformatics*, **31(24)**, 4020-4022
- Yang, J., Roy, A., Zhang, Y. (2013) Protein-ligand binding site recognition using complementary binding-specific substructure comparison and sequence profile alignment, *Bioinformatics*, **29(20)**, 2588-95
